# Supplementary material for: Dermal appendage-dependent patterning of zebrafish atoh1a+ Merkel cells
Source: eLife. 2023 Jan 17;12:e85800. doi: 10.7554/eLife.85800 (PMC9901935; doi:10.7554/eLife.85800)
Supplement: Figure 1—figure supplement 3—source data 1. [file elife-85800-fig1-figsupp3-data1.xlsx]

## Sheet: Sheet1
fish	sox2+ cells	atoh1+ cells	sox2+/atoh1+	sox2+/atoh1-	% double +	%sox2+/atoh1-	%sox2-/atoh1+	area analyzed (um2)	avg/scale %double+	avg/scale sox2+/atoh1-	sox2-/atoh1+	total
1	35	25	25	10	71.4286	28.5714	0	12447.9
1	33	28	28	5	84.8485	15.1515	0	12447.9
1	40	32	32	8	80	20	0	12447.9	78.759	21.241	0	100
1	30	20	20	10	66.6667	33.3333	0	12447.9
1	20	11	11	9	55	45	0	12447.9
1	37	25	25	12	67.5676	32.4324	0	12447.9	63.0781	36.9219	0	100
2	31	16	16	15	51.6129	48.3871	0	16677.1
2	36	27	27	9	75	25	0	12287.7
2	35	29	29	6	82.8571	17.1429	0	14268.3	69.8233	30.1767	0	100
3	54	45	45	9	83.3333	16.6667	0	12272.2
3	52	38	38	14	73.0769	26.9231	0	12272.2
3	45	41	40	4	88.8889	8.88889	2.22222	12272.2	81.7664	17.4929	0.740741	100
3	32	16	16	16	50	50	0	12272.2
3	14	9	9	5	64.2857	35.7143	0	12272.2
3	33	17	17	16	51.5152	48.4848	0	12272.2	55.267	44.733	0	100
4,5	57	41	40	16	70.1754	28.0702	1.75439	28355.2
4,5	47	25	24	22	51.0638	46.8085	2.12766	28355.2
4,5	30	14	14	16	46.6667	53.3333	0	28355.2
4,5	53	33	33	20	62.2642	37.7358	0	28355.2
4,5	38	25	24	13	63.1579	34.2105	2.63158	28355.2
4,5	44	37	36	7	81.8182	15.9091	2.27273	28355.2	62.5244	36.0112	1.46439	100
1	28	19	19	9	67.8571	32.1429	0	11250.8
1	41	25	25	16	60.9756	39.0244	0	23318
1	62	31	31	31	50	50	0	25312.8	59.6109	40.3891	0	100
1	37	21	21	16	56.7568	43.2432	0	11250.8
1	35	19	19	16	54.2857	45.7143	0	11250.8
1	21	14	14	7	66.6667	33.3333	0	11250.8	59.2364	40.7636	0	100
1	37	26	26	11	70.2703	29.7297	0	11250.8
1	21	15	15	6	71.4286	28.5714	0	11250.8
1	29	16	16	13	55.1724	44.8276	0	11250.8	65.6238	34.3762	0	100
1	65	57	57	8	87.6923	12.3077	0	25312.8
1	75	71	71	4	94.6667	5.33333	0	25312.8
1	81	63	63	18	77.7778	22.2222	0	25312.8
	1102	774	769	328						33.5673
										66.4327
		of atoh1a+ cells, how many are also sox2+?	99.354
		of sox2+ cells, how many are atoh1a+	69.7822
