# Supplementary material for: Dermal appendage-dependent patterning of zebrafish atoh1a+ Merkel cells
Source: eLife. 2023 Jan 17;12:e85800. doi: 10.7554/eLife.85800 (PMC9901935; doi:10.7554/eLife.85800)
Supplement: Figure 2—source data 1. [file elife-85800-fig2-data1.xlsx]

## Sheet: Sheet1
fish	size (mm)	genotype	scale	innervated	total	fraction	percent
1	25.8	p2rx3a	1	26	29	0.896552	89.6552
1	25.8	p2rx3a	2	27	29	0.931034	93.1034
2	26.5	p2rx3a	3	25	27	0.925926	92.5926
2	26.5	p2rx3a	4	25	29	0.862069	86.2069
3	30	p2rx3a	5	25	29	0.862069	86.2069
3	30	p2rx3a	6	26	30	0.866667	86.6667
4	28.5	p2rx3a	7	17	26	0.653846	65.3846
4	28.5	p2rx3a	8	25	29	0.862069	86.2069
5	25.5	p2rx3b	1	30	30	1	100
5	25.5	p2rx3b	2	29	30	0.966667	96.6667
6	28	p2rx3b	3	30	30	1	100
6	28	p2rx3b	4	30	30	1	100
7	25.5	p2rx3b	5	26	27	0.962963	96.2963
7	25.5	p2rx3b	6	27	28	0.964286	96.4286
8	22.5	p2rx3b	7	29	29	1	100
8	22.5	p2rx3b	8	24	24	1	100
9	23.88	trpa1b	1	22	25	0.88	88
10	23.03	trpa1b	2	25	25	1	100
11	23.62	trpa1b	3	25	25	1	100
12	25.45	trpa1b	4	23	25	0.92	92
13	17.04	trpa1b	5	25	25	1	100
14	23	trpa1b	6	25	25	1	100
15	20.98	trpa1b	7	22	25	0.88	88
16	22.52	trpa1b	8	25	25	1	100
17	21.29	trpa1b	9	25	25	1	100
18	n/a	zn-12	1	21	21	1	100
18	n/a	zn-12	2	17	19	0.894737	89.4737
18	n/a	zn-12	3	10	12	0.833333	83.3333
18	n/a	zn-12	4	20	22	0.909091	90.9091
18	n/a	zn-12	5	15	23	0.652174	65.2174
18	n/a	zn-12	6	23	27	0.851852	85.1852
18	n/a	zn-12	7	13	19	0.684211	68.4211
19	n/a	zn-12	8	48	48	1	100
19	n/a	zn-12	9	65	65	1	100
20	n/a	zn-12	10	24	25	0.96	96
20	n/a	zn-12	11	28	30	0.933333	93.3333
