# Supplementary material for: Dermal appendage-dependent patterning of zebrafish atoh1a+ Merkel cells
Source: eLife. 2023 Jan 17;12:e85800. doi: 10.7554/eLife.85800 (PMC9901935; doi:10.7554/eLife.85800)
Supplement: Figure 4—source data 1. [file elife-85800-fig4-data1.xlsx]

## Sheet: Sheet1
genotype	percent
sox10-LA	0
sox10-LA	0
sox10-LA	0
sox10-LA	0
sox10-LA	0
sox10-LA	0
sox10-LA	0
sox10-LA	0
sox10-LA	1.81818
sox10-LA	0
sox10-LA	0
tp63-LA	40.5263
tp63-LA	23.2143
tp63-LA	18.8119
tp63-LA	31.6176
tp63-LA	43.6842
tp63-LA	27.027
tp63-LA	61.9048
tp63-LA	1.72414
tp63-LA	8.23529
tp63-LA	12.963
tp63-Eos	46.4
tp63-Eos	20.3008
tp63-Eos	21.2598
tp63-Eos	19.0083
tp63-Eos	5.61798
tp63-Eos	21.4286
tp63-Eos	43.4211
tp63-Eos	41.5385
tp63-Eos	80.6818
tp63-Eos	18.6567
