# Supplementary material for: Dermal appendage-dependent patterning of zebrafish atoh1a+ Merkel cells
Source: eLife. 2023 Jan 17;12:e85800. doi: 10.7554/eLife.85800 (PMC9901935; doi:10.7554/eLife.85800)
Supplement: Figure 4—source data 2. [file elife-85800-fig4-data2.xlsx]

## Sheet: Sheet1
Genotype	MCs expresssing lineage trace	Recombination efficiency
tp63cre_atoh1aLifeact-EGFP	40.5263	33.219
tp63cre_atoh1aLifeact-EGFP	23.2143	38.336
tp63cre_atoh1aLifeact-EGFP	18.8119	22.116
tp63cre_atoh1aLifeact-EGFP	31.6176	51.802
tp63cre_atoh1aLifeact-EGFP	43.6842	70.579
tp63cre_atoh1aLifeact-EGFP	27.027	45.239
tp63cre_atoh1aLifeact-EGFP	61.9048	36.636
tp63cre_atoh1aLifeact-EGFP	1.72414	16.048
tp63cre_atoh1aLifeact-EGFP	8.23529	31.615
tp63cre_atoh1aLifeact-EGFP	12.963	6.566
tp63cre_atoh1a-nlsEos	46.4	63.07
tp63cre_atoh1a-nlsEos	20.3008	43.768
tp63cre_atoh1a-nlsEos	21.2598	42.132
tp63cre_atoh1a-nlsEos	19.0083	41.479
tp63cre_atoh1a-nlsEos	5.61798	19.527
tp63cre_atoh1a-nlsEos	21.4286	43.361
tp63cre_atoh1a-nlsEos	43.4211	34.206
tp63cre_atoh1a-nlsEos	41.5385	47.176
tp63cre_atoh1a-nlsEos	80.6818	45.991
tp63cre_atoh1a-nlsEos	18.6567	50.158
