# Supplementary material for: Dermal appendage-dependent patterning of zebrafish atoh1a+ Merkel cells
Source: eLife. 2023 Jan 17;12:e85800. doi: 10.7554/eLife.85800 (PMC9901935; doi:10.7554/eLife.85800)
Supplement: Figure 5—source data 1. [file elife-85800-fig5-data1.xlsx]

## Sheet: Sheet1
size (mm)	fish	day	red cells	total cells	percent	percent 2
26.76	1	0	85	85	na
26.76	1	7	67	122	78.8235	1.43529
26.76	1	14	43	119	50.5882	1.4
26.76	1	21	26	96	30.5882	1.12941
26.76	1	28	20	87	23.5294	1.02353
24.07	2	0	77	77	na
24.07	2	7	28	39	36.3636	0.506494
24.07	2	14	21	43	27.2727	0.558442
24.25	3	0	48	48	na
24.25	3	7	41	68	85.4167	1.41667
24.25	3	14	43	78	89.5833	1.625
24.25	3	21	42	79	87.5	1.64583
24.25	3	28	42	88	87.5	1.83333
27.46	4	0	42	42	na
27.46	4	7	35	73	83.3333	1.7381
27.46	4	14	31	91	73.8095	2.16667
30.76	5	0	188	188	na
30.76	5	7	161	190	85.6383	1.01064
30.76	5	14	147	220	78.1915	1.17021
30.76	5	21	136	238	72.3404	1.26596
30.76	5	28	121	244	64.3617	1.29787
28.89	6	0	222	222	na
28.89	6	7	184	235	82.8829	1.05856
28.89	6	14	167	259	75.2252	1.16667
28.89	6	21	134	201	60.3604	0.905405
28.89	6	28	119	251	53.6036	1.13063
31.25	7	0	182	182	na
31.25	7	7	172	217	94.5055	1.19231
31.25	7	14	129	187	70.8791	1.02747
31.25	7	21	119	251	65.3846	1.37912
32.4	8	0	189	189	na
32.4	8	7	137	175	72.4868	0.925926
32.4	8	14	114	180	60.3175	0.952381
32.4	8	21	89	152	47.0899	0.804233
32.4	8	28	84	155	44.4444	0.820106
