# Supplementary material for: Dermal appendage-dependent patterning of zebrafish atoh1a+ Merkel cells
Source: eLife. 2023 Jan 17;12:e85800. doi: 10.7554/eLife.85800 (PMC9901935; doi:10.7554/eLife.85800)
Supplement: Figure 6—source data 1. [file elife-85800-fig6-data1.xlsx]

## Sheet: Sheet1
Region	SL_mm	cell_density_mm2
Operculum	25.42	2883.16
Lens	25.42	984.482
Tail	25.42	151.702
Tail	25.42	208.59
Scale	25.42	335.008
Scale	25.42	587.845
Lens	28.42	2062.2
Operculum	28.42	3728.32
Tail	28.42	195.948
Tail	28.42	192.788
Tail	28.42	335.008
Scale	28.42	104.295
Scale	28.42	118.517
Operculum	21.92	3203.12
Tail	21.92	322.366
Scale	21.92	368.193
Scale	21.92	241.775
Lens	24.99	2033.75
Operculum	24.99	3933.19
Tail	24.99	371.353
Tail	24.99	412.439
Scale	24.99	711.102
Scale	24.99	575.203
Lens	25.83	1679.78
Operculum	25.8	4810.21
Tail	25.8	320.786
Scale	25.8	603.647
Lens	27.29	1155.15
Operculum	27.29	2115.92
Operculum	27.29	2387.72
Tail	27.29	28.4441
Scale	27.29	451.945
Scale	27.29	709.522
Operculum	20.81	3549.19
Lens	24	1992.67
Scale	24	1030.3
Lens	24.12	1344.77
Scale	24.5	725.1
Operculum	24.76	2221.01
Scale	25	897
Lens	25.3	845.422
Tail	26.4	324.484
Scale	27	739.5
Tail	27.33	383.055
Operculum	28.63	4524.98
Scale	29	718
Tail	29.46	359.396
