# Supplementary material for: Dermal appendage-dependent patterning of zebrafish atoh1a+ Merkel cells
Source: eLife. 2023 Jan 17;12:e85800. doi: 10.7554/eLife.85800 (PMC9901935; doi:10.7554/eLife.85800)
Supplement: Figure 7—source data 1. [file elife-85800-fig7-data1.xlsx]

## Sheet: Sheet1
Fish	fish_mm	cell_density_mm2
1	3.43	0
1	3.43	0
1	3.43	0
2	3.54	0
3	3.66	1.6
4	3.95	0
5	4.71	0
5	4.71	0
5	4.71	0
6	5.32	0
6	5.32	1.6
6	5.32	0
7	5.54	0
8	5.89	0
8	5.89	0
9	6.11	0
9	6.11	1.6
9	6.11	0
10	6.21	1.6
10	6.21	0
10	6.21	0
11	6.58	1.6
11	6.58	0
12	7.4	3.7
13	7.6	1.6
13	7.6	0
13	7.6	0
14	7.9	10
15	8.03	0
15	8.03	4.7
15	8.03	1.6
16	8.07	0
16	8.07	0
16	8.07	0
17	8.19	3.2
17	8.19	3.2
17	8.19	0
18	8.2	13.3
18	8.2	56
19	8.4	54.1
20	8.6	36.3
20	8.6	10.2
21	8.7	88.2
22	8.8	50.9
23	9	20.1
24	9.01	47.4
24	9.01	83.8
24	9.01	71.1
25	9.2	77
26	9.4	50.4
27	9.5	49.2
28	9.6	36.3
28	9.6	26.9
28	9.6	37.9
29	9.62	30
29	9.62	56.9
29	9.62	26.9
30	9.9	75.5
31	10	206.4
32	10.1	651.8
33	10.2	164.9
34	10.3	755.5
35	10.9	401.3
36	11.1	822.4
37	11.5	290
38	11.9	527.9
39	12	616.6
40	12.1	807.2
41	12.6	929.4
42	12.7	548.5
43	12.9	1023.7
44	13.1	906.7
45	13.2	1086.1
46	14.5	487.3
47	14.6	1249.2
48	14.9	1082.5
49	15.1	1076.7
50	15.5	639.7
51	16.4	852.8
51	16.4	720.2
52	18.6	482.6
