# Supplementary material for: Dermal appendage-dependent patterning of zebrafish atoh1a+ Merkel cells
Source: eLife. 2023 Jan 17;12:e85800. doi: 10.7554/eLife.85800 (PMC9901935; doi:10.7554/eLife.85800)
Supplement: Figure 7—source data 2. [file elife-85800-fig7-data2.xlsx]

## Sheet: Sheet1
Fish	fish_mm	scale_area_mm2	total_cells	cell_density_mm2
1	9.5	0.0186066	2	107.5
1	9.5	0.020048	0	0
1	9.5	0.0203335	0	0
1	9.5	0.020897	3	143.6
1	9.5	0.0238582	2	83.8
1	9.5	0.045743	5	109.3
1	9.5	0.0464312	3	64.6
1	9.5	0.0468578	12	256.1
1	9.5	0.0470921	3	63.7
1	9.5	0.0474111	6	126.6
2	9.9	0.0194939	0	0
2	9.9	0.0201281	1	49.7
2	9.9	0.0205743	1	48.6
2	9.9	0.0213577	3	140.5
2	9.9	0.0214827	1	46.5
2	9.9	0.0233082	1	42.9
2	9.9	0.0347908	0	0
2	9.9	0.0357612	3	83.9
2	9.9	0.035998	7	194.5
2	9.9	0.0367287	5	136.1
2	9.9	0.036973	3	81.1
2	9.9	0.0371697	5	134.5
3	10.2	0.0797037	4	50.1859
3	10.2	0.08114	23	283.461
3	10.2	0.0835349	16	191.537
3	10.2	0.0840999	19	225.922
4	11	0.113084	30	265.29
5	11.9	0.16614	27	162.514
5	11.9	0.2	21	123.3
6	12.7	0.161346	62	384.268
6	12.7	0.16652	79	474.417
7	13.1	0.349777	112	320.204
8	13.2	0.285227	128	448.765
9	14.5	0.317294	74	233.222
10	14.9	0.431242	144	333.919
11	15.1	0.381845	124	324.739
12	15.5	0.591729	149	251.804
13	15.8	0.453992	269	592.521
13	15.8	0.482681	112	232.037
13	15.8	0.566596	157	277.093
13	15.8	0.640561	165	257.587
13	15.8	0.682174	130	190.567
14	16.7	0.676867	34	50.2314
14	16.7	0.677051	28	41.3558
14	16.7	0.86405	38	43.9789
15	17.3	0.611547	126	206.035
15	17.3	0.74628	355	475.693
15	17.3	0.829975	252	303.624
15	17.3	0.926633	220	237.419
15	17.3	1.12135	195	173.898
16	17.7	0.637277	16	25.1068
17	18.1	0.654932	354	540.514
17	18.1	0.662769	249	375.696
17	18.1	0.727449	267	367.036
17	18.1	0.790873	336	424.847
17	18.1	0.964805	412	427.029
17	18.1	0.967682	324	334.821
18	19.8	0.819484	381	464.927
18	19.8	0.86178	379	439.787
18	19.8	0.983763	504	512.319
18	19.8	1.0111	402	397.588
18	19.8	1.0428	235	225.354
18	19.8	1.10022	468	425.369
18	19.8	1.13847	479	420.739
