# Supplementary material for: Dermal appendage-dependent patterning of zebrafish atoh1a+ Merkel cells
Source: eLife. 2023 Jan 17;12:e85800. doi: 10.7554/eLife.85800 (PMC9901935; doi:10.7554/eLife.85800)
Supplement: Figure 8—figure supplement 1—source data 1. [file elife-85800-fig8-figsupp1-data1.xlsx]

## Sheet: Summary_d0
group	file	region	day	date	threshold	cells	area	density
sib	3.4.21 atoh1a eda photoconversion day 0 sibling fish mm 003 - Denoise_ai.nd2	1	0	3.4.21	662	262	177012	1.48013
sib	3.4.21 atoh1a eda photoconversion day 0 sibling fish mm 004 - Denoise_ai	1	0	3.4.21	707	239	107707	2.21898
sib		2	0	3.4.21	707	39	18041.1	2.16173
sib	3.4.21 atoh1a eda photoconversion day 0 sibling fish mm 005 - Denoise_ai	1	0	3.4.21	692	207	91283.1	2.26767
sib		2	0	3.4.21	692	47	26174.6	1.79563
sib	3.4.21 atoh1a eda photoconversion day 0 sibling fish mm 006 - Denoise_ai	1	0	3.4.21	631	245	251832	0.972872
mut	3.4.21 atoh1a eda photoconversion day 0 sibling fish mm 007 - Denoise_ai	1	0	3.4.21	617	251	240609	1.04319
mut	3.4.21 atoh1a eda photoconversion day 0 sibling fish mm 009 - Denoise_ai.nd2	1	0	3.4.21	661	145	214132	0.677152
mut	3.4.21 atoh1a eda photoconversion day 0 sibling fish mm 010 - Denoise_ai.nd2	1	0	3.4.21	617	125	249297	0.501409
mut	3.4.21 atoh1a eda photoconversion day 0 sibling fish mm 011 - Denoise_ai	1	0	3.4.21	661	167	260731	0.640507
mut	3.4.21 atoh1a eda photoconversion day 0 sibling fish mm 012 - Denoise_ai	1	0	3.4.21	662	80	272765	0.293293
mut	3.4.21 atoh1a eda photoconversion day 0 sibling fish mm 013 - Denoise_ai	1	0	3.4.21	660	141	243661	0.578672
mut	3.4.21 atoh1a eda photoconversion day 0 sibling fish mm 014 - Denoise_ai.nd2	1	0	3.4.21	676	74	276581	0.267553
mut	3.4.21 atoh1a eda photoconversion day 0 sibling fish mm 015 - Denoise_ai	1	0	3.4.21	647	132	139633	0.945334
mut	3.4.21 atoh1a eda photoconversion day 0 sibling fish mm 016 - Denoise_ai	1	0	3.4.21	661	128	171758	0.745236
sib	3.12.21 atoh1a eda sibling photoconversion day 0 19.0mm 003 - Denoise_ai	1	0	3.12.21	857	31	25760.2	1.20341
sib	3.12.21 atoh1a eda sibling photoconversion day 0 19.0mm 003 - Denoise_ai	2	0	3.12.21	857	63	94413.5	0.667278
sib	3.12.21 atoh1a eda sibling photoconversion day 0 19.0mm 003 - Denoise_ai	3	0	3.12.21	857	106	153715	0.689588
sib	3.12.21 atoh1a eda sibling photoconversion day 0 19.0mm 003 - Denoise_ai	4	0	3.12.21	857	28	63035.1	0.444197
sib		full	0	3.12.21	857	262	533387	0.491201
sib	3.12.21 atoh1a eda sibling photoconversion day 0 23.0mm 001 - Denoise_ai	1	0	3.12.21	841	134	131218	1.0212
sib	3.12.21 atoh1a eda sibling photoconversion day 0 23.0mm 001 - Denoise_ai	2	0	3.12.21	841	228	233583	0.976099
sib		full	0	3.12.21	841	398	533386	0.746176
sib	3.12.21 atoh1a eda sibling photoconversion day 0 23.2mm 002 - Denoise_ai	1	0	3.12.21	840	161	132938	1.21109
sib	3.12.21 atoh1a eda sibling photoconversion day 0 23.2mm 002 - Denoise_ai	2	0	3.12.21	840	323	262561	1.23019
sib		full	0	3.12.21	840	511	533936	0.957044
mut	mislabel actually mutant - 3.12.21 atoh1a sibling photoconversion day 0 19.73mm 004 - Denoise_ai	1	0	3.12.21	874	101	381680	0.264619
mut		2	0	3.12.21	hand	35	151368	0.231225

## Sheet: Summary_d4
group	file	region	day	date	threshold red	red cells	threshold green	green cells	area	red	green	new green den	green/red/area
mut	3.8.21 atoh1a eda photoconversion day 4 mutant 19.8 011 - Denoise_ai	1	4	3.8.21	652	59	666	102	212817	0.277233	0.479285	0.202051	8.12347
mut	3.8.21 atoh1a eda photoconversion day 4 mutant 19.8 012 - Denoise_ai.nd2	1	4	3.8.21	794	112	675	176	260386	0.43013	0.675919	0.245789	6.03499
mut	3.8.21 atoh1a eda photoconversion day 4 mutant 22.45 007 - Denoise_ai	1	4	3.8.21	675	138	hand	162	281250	0.490667	0.576	0.0853333	4.17391
mut	3.8.21 atoh1a eda photoconversion day 4 mutant 22.45 008 - Denoise_ai.nd2	1	4	3.8.21	hand	52	hand	58	248933	0.208892	0.232995	0.0241029	4.48066
mut	3.8.21 atoh1a eda photoconversion day 4 mutant 23.34 009 - Denoise_ai	1	4	3.8.21	943	226	hand	236	281250	0.803556	0.839111	0.0355556	3.71288
mut	3.8.21 atoh1a eda photoconversion day 4 mutant 23.34 010 - Denoise_ai.nd2	1	4	3.8.21	hand	222	hand	245	281250	0.789333	0.871111	0.0817778	3.92392
sib	3.8.21 atoh1a eda photoconversion day 4 sibling 21.1mm 004 - Denoise_ai	1	4	3.8.21	750	127	616	147	142841	0.8891	1.02912	0.140016	8.10328
sib	3.8.21 atoh1a eda photoconversion day 4 sibling 21.1mm 006 - Denoise_ai	1	4	3.8.21	795	101	721	129	135893	0.74323	0.949274	0.206044	9.39875
sib	3.8.21 atoh1a eda photoconversion day 4 sibling fish 20.19mm - Denoise_ai	1	4	3.8.21	721	250	721	306	194366	1.28623	1.57435	0.288116	6.29739
sib	3.8.21 atoh1a eda photoconversion day 4 sibling fish 20.19mm - Denoise_ai	2	4	3.8.21	721	109	721	124	50620.5	2.15328	2.4496	0.296322	22.4734
sib	3.8.21 atoh1a eda photoconversion day 4 sibling fish 20.19mm - Denoise_ai	3	4	3.8.21	721	65	721	85	36386	1.7864	2.33606	0.549661	35.9394
sib	3.8.21 atoh1a eda photoconversion day 4 sibling r fish 22mm03 - Denoise_ai	1	4	3.8.21	721	134	660	172	96669.5	1.38617	1.77926	0.393092	13.278
sib	3.8.21 atoh1a eda photoconversion day 4 sibling r fish 22mm03 - Denoise_ai	2	4	3.8.21	721	26	660	29	12849.4	2.02344	2.25692	0.233474	86.8045
sib	3.8.21 atoh1a eda photoconversion day 4 sibling r1 fish 22mm002 - Denoise_ai	1	4	3.8.21	660	227	721	299	183044	1.24014	1.63349	0.393349	7.19599
sib	3.16.21 eda photoconversion day 4 sibling 20.42mm - Denoise_ai	1	4	3.16.21	884	20	482	37	33268	0.601179	1.11218	0.511002	55.609
sib		2	4	3.16.21	884	98	482	134	140352	0.698246	0.954745	0.256499	9.74229
sib	3.16.21 eda photoconversion day 4 sibling 23.31mm001 - Denoise_ai	1	4	3.16.21	751	102	650	149	109721	0.92963	1.35799	0.428359	13.3136
sib		2	4	3.16.21	751	157	650	244	230659	0.680659	1.05784	0.37718	6.73783
sib		full	4	3.16.21	751	293	650	452	533936	0.548755	0.846544	0.297789	2.88923
mut	3.16.21 eda photoconversion day 4 mut 20.51mm004 - Denoise_ai	1	4	3.16.21	hand	80	hand	88	533936	0.149831	0.164814	0.0149831	2.06017

## Sheet: eda photoconversion 3.4.21 day 
day 0
group	file	region	threshold	cells	area	density
sib	3.4.21 atoh1a eda photoconversion day 0 sibling fish mm 003 - Denoise_ai.nd2	1	662	262	177012	1.48013
sib	3.4.21 atoh1a eda photoconversion day 0 sibling fish mm 004 - Denoise_ai	1	707	239	107707	2.21898
sib		2	707	39	18041.1	2.16173
sib	3.4.21 atoh1a eda photoconversion day 0 sibling fish mm 005 - Denoise_ai	1	692	207	91283.1	2.26767
sib		2	692	47	26174.6	1.79563
sib	3.4.21 atoh1a eda photoconversion day 0 sibling fish mm 006 - Denoise_ai	1	631	245	251832	0.972872
mut	3.4.21 atoh1a eda photoconversion day 0 sibling fish mm 007 - Denoise_ai	1	617	251	240609	1.04319
mut	3.4.21 atoh1a eda photoconversion day 0 sibling fish mm 009 - Denoise_ai.nd2	1	661	145	214132	0.677152
mut	3.4.21 atoh1a eda photoconversion day 0 sibling fish mm 010 - Denoise_ai.nd2	1	617	125	249297	0.501409
mut	3.4.21 atoh1a eda photoconversion day 0 sibling fish mm 011 - Denoise_ai	1	661	167	260731	0.640507
mut	3.4.21 atoh1a eda photoconversion day 0 sibling fish mm 012 - Denoise_ai	1	662	80	272765	0.293293
mut	3.4.21 atoh1a eda photoconversion day 0 sibling fish mm 013 - Denoise_ai	1	660	141	243661	0.578672
mut	3.4.21 atoh1a eda photoconversion day 0 sibling fish mm 014 - Denoise_ai.nd2	1	676	74	276581	0.267553
mut	3.4.21 atoh1a eda photoconversion day 0 sibling fish mm 015 - Denoise_ai	1	647	132	139633	0.945334
mut	3.4.21 atoh1a eda photoconversion day 0 sibling fish mm 016 - Denoise_ai	1	661	128	171758	0.745236
day 4		region	threshold red	cells	threshold green	cells	area	red	green	green/red/area
mut	3.8.21 atoh1a eda photoconversion day 4 mutant 19.8 011 - Denoise_ai	1	652	59	666	102	212817	0.277233	0.479285	8.12347
mut	3.8.21 atoh1a eda photoconversion day 4 mutant 19.8 012 - Denoise_ai.nd2	1	794	112	675	176	260386	0.43013	0.675919	6.03499
mut	3.8.21 atoh1a eda photoconversion day 4 mutant 22.45 007 - Denoise_ai	1	675	138	hand	162	281250	0.490667	0.576	4.17391			lots of pigment cells
mut	3.8.21 atoh1a eda photoconversion day 4 mutant 22.45 008 - Denoise_ai.nd2	1	hand	52	hand	58	248933	0.208892	0.232995	4.48066			lots of pigment cells
mut	3.8.21 atoh1a eda photoconversion day 4 mutant 23.34 009 - Denoise_ai	1	943	226	hand	236	281250	0.803556	0.839111	3.71288
mut	3.8.21 atoh1a eda photoconversion day 4 mutant 23.34 010 - Denoise_ai.nd2	1	hand	222	hand	245	281250	0.789333	0.871111	3.92392
sib	3.8.21 atoh1a eda photoconversion day 4 sibling 21.1mm 004 - Denoise_ai	1	750	127	616	147	142841	0.8891	1.02912	8.10328
sib	3.8.21 atoh1a eda photoconversion day 4 sibling 21.1mm 006 - Denoise_ai	1	795	101	721	129	135893	0.74323	0.949274	9.39875
sib	3.8.21 atoh1a eda photoconversion day 4 sibling fish 20.19mm - Denoise_ai	1	721	250	721	306	194366	1.28623	1.57435	6.29739
sib	3.8.21 atoh1a eda photoconversion day 4 sibling fish 20.19mm - Denoise_ai	2	721	109	721	124	50620.5	2.15328	2.4496	22.4734
sib	3.8.21 atoh1a eda photoconversion day 4 sibling fish 20.19mm - Denoise_ai	3	721	65	721	85	36386	1.7864	2.33606	35.9394
sib	3.8.21 atoh1a eda photoconversion day 4 sibling r fish 22mm03 - Denoise_ai	1	721	134	660	172	96669.5	1.38617	1.77926	13.278
sib	3.8.21 atoh1a eda photoconversion day 4 sibling r fish 22mm03 - Denoise_ai	2	721	26	660	29	12849.4	2.02344	2.25692	86.8045
sib	3.8.21 atoh1a eda photoconversion day 4 sibling r1 fish 22mm002 - Denoise_ai	1	660	227	721	299	183044	1.24014	1.63349	7.19599

## Sheet: eda atoh1a photoconversion star
day 0
group	file	region	threshold	cells	area	density
sib	3.12.21 atoh1a eda sibling photoconversion day 0 19.0mm 003 - Denoise_ai	1	857	31	25760.2	1.20341
sib	3.12.21 atoh1a eda sibling photoconversion day 0 19.0mm 003 - Denoise_ai	2	857	63	94413.5	0.667278
sib	3.12.21 atoh1a eda sibling photoconversion day 0 19.0mm 003 - Denoise_ai	3	857	106	153715	0.689588
sib	3.12.21 atoh1a eda sibling photoconversion day 0 19.0mm 003 - Denoise_ai	4	857	28	63035.1	0.444197
sib		full	857	262	533387	0.491201
sib	3.12.21 atoh1a eda sibling photoconversion day 0 23.0mm 001 - Denoise_ai	1	841	134	131218	1.0212
sib	3.12.21 atoh1a eda sibling photoconversion day 0 23.0mm 001 - Denoise_ai	2	841	228	233583	0.976099
sib		full	841	398	533386	0.746176
sib	3.12.21 atoh1a eda sibling photoconversion day 0 23.2mm 002 - Denoise_ai	1	840	161	132938	1.21109
sib	3.12.21 atoh1a eda sibling photoconversion day 0 23.2mm 002 - Denoise_ai	2	840	323	262561	1.23019
sib		full	840	511	533936	0.957044
mut	mislabel actually mutant - 3.12.21 atoh1a sibling photoconversion day 0 19.73mm 004 - Denoise_ai	1	874	101	381680	0.264619
mut		2	hand	35	151368	0.231225
day 4
		region	red threshold	red cells	green threshold	green cells	area	red den	green den	new green den	100000*ratio/area
sib	3.16.21 eda photoconversion day 4 sibling 20.42mm - Denoise_ai	1	884	20	482	37	33268	0.601179	1.11218	0.511002	5.5609
sib		2	884	98	482	134	140352	0.698246	0.954745	0.256499	0.974229
sib	3.16.21 eda photoconversion day 4 sibling 23.31mm001 - Denoise_ai	1	751	102	650	149	109721	0.92963	1.35799	0.428359	1.33136
sib		2	751	157	650	244	230659	0.680659	1.05784	0.37718	0.673783
sib		full	751	293	650	452	533936	0.548755	0.846544	0.297789	0.288923
mut	3.16.21 eda photoconversion day 4 mut 20.51mm004 - Denoise_ai	1	hand	80	hand	88	533936	0.149831	0.164814	0.0149831	0.206017
