# Supplementary material for: Dermal appendage-dependent patterning of zebrafish atoh1a+ Merkel cells
Source: eLife. 2023 Jan 17;12:e85800. doi: 10.7554/eLife.85800 (PMC9901935; doi:10.7554/eLife.85800)
Supplement: Figure 8—source data 1. [file elife-85800-fig8-data1.xlsx]

## Sheet: Sheet1
Figure 8G-Source data
Fish	fish_mm	genotype	cell_density_mm2
1	8.78	eda.sibs	285.822
2	8.92	eda.mut	309.725
3	8.95	eda.mut	382.275
4	9.27	eda.sibs	264.116
5	9.65	eda.mut	366.388
6	9.77	eda.sibs	716.029
7	10.12	eda.mut	201.806
8	10.28	eda.mut	113.776
9	11.48	eda.sibs	583.235
10	12.43	eda.sibs	608.139
11	12.54	eda.mut	1050.85
12	19.07	eda.sibs	453.525
13	13.07	eda.mut	418.418
14	13.41	eda.mut	418.475
15	13.79	eda.mut	617.869
16	14.27	eda.sibs	947.117
17	14.52	eda.mut	98.4365
18	15.94	eda.mut	235.293
19	16.23	eda.sibs	985.733
20	16.34	eda.mut	623.431
21	18.8	eda.mut	295.503
22	18.81	eda.sibs	741.127
23	19.07	eda.sibs	872.413
24	21.74	eda.mut	271.055
25	22.25	eda.sibs	662.907
26	22.83	eda.sibs	646.182
27	24.41	eda.mut	97.3683
28	24.58	eda.sibs	1423.79
29	27.56	eda.mut	251.704
