# Supplementary material for: Dermal appendage-dependent patterning of zebrafish atoh1a+ Merkel cells
Source: eLife. 2023 Jan 17;12:e85800. doi: 10.7554/eLife.85800 (PMC9901935; doi:10.7554/eLife.85800)
Supplement: Figure 8—source data 2. [file elife-85800-fig8-data2.xlsx]

## Sheet: 6.29.21 eda eyes and gills anal
fish	region	treatment	size	cells	area	density
1	eye	mut	24.98	1540	632820	2433.55
1	gill	mut	24.98	3090	632820	4882.9
2	eye	mut	24.58	1326	632820	2095.38
2	gill	mut	24.58	3918	632820	6191.33
3	eye	mut	20.06	1477	632820	2334
3	gill	mut	20.06	1929	514883	3746.49
4	eye	mut	18.19	1672	632820	2642.14
4	gill	mut	18.19	3271	608784	5373
5	eye	mut	18.72	1732	632820	2736.95
5	gill	mut	18.72	3131	590308	5304.01
6	eye	sib	26.43	1204	632820	1902.59
6	gill	sib	26.43	1300	632820	2054.3
7	eye	sib	26.25	1645	632820	2599.47
7	gill	sib	26.25	1420	536010	2649.21
8	eye	sib	16.09	1472	632820	2326.09
8	gill	sib	16.09	3100	611861	5066.51
9	eye	sib	16.95	1363	632820	2153.85
9	gill	sib	16.95	2988	632820	4721.72
10	eye	sib	18.76	1396	632820	2206
10	gill	sib	18.76	2941	566874	5188.1
