# Supplementary material for: Dermal appendage-dependent patterning of zebrafish atoh1a+ Merkel cells
Source: eLife. 2023 Jan 17;12:e85800. doi: 10.7554/eLife.85800 (PMC9901935; doi:10.7554/eLife.85800)
Supplement: Figure 9—figure supplement 1—source data 1. [file elife-85800-fig9-figsupp1-data1.xlsx]

## Sheet: Juv Scale Data
	Area	Perim.	Circ.	Feret	FeretX	FeretY	FeretAngle	MinFeret	AR	Round	Solidity	Micron coefficient	Area (um^2)	Perim. (um)	Feret (um)	Type
1	334038	2393.32	0.733	894.045	384	1398	89.423	507	1.678	0.596	0.96	0.5179	89596	1239.5	463.026	sib
2	506274	2937.16	0.737	1141.01	333	1494	87.589	655.476	1.758	0.569	0.903	0.5179	135793	1521.16	590.93	sib
3	502704	2877.9	0.763	1171.54	360	1542	87.064	599.606	1.818	0.55	0.974	0.5179	134836	1490.46	606.74	sib
4	478584	2818.59	0.757	1052.48	237	1470	80.484	706.413	1.457	0.686	0.91	0.5179	128366	1459.75	545.081	sib
5	443494	2618.1	0.813	957.47	357	1404	72.871	653.958	1.43	0.699	0.964	0.5179	118954	1355.92	495.874	sib
6	489528	2875.5	0.744	1082.2	369	423	93.656	669	1.579	0.633	0.917	0.5179	131302	1489.22	560.473	sib
7	436269	2658.01	0.776	1065.37	309	411	97.605	612.854	1.613	0.62	0.964	0.5179	117016	1376.58	551.757	sib
8	454011	2726.04	0.768	1014.16	363	1404	88.983	674.129	1.439	0.695	0.909	0.5179	121775	1411.82	525.234	sib
9	394944	2569.5	0.752	1008.45	312	1410	88.295	595.685	1.625	0.615	0.921	0.5179	105932	1330.74	522.275	sib
10	494232	3013.41	0.684	1218.72	306	1539	88.025	603.815	1.974	0.507	0.919	0.5179	132563	1560.65	631.178	sib
11	550578	3014.08	0.762	1188.55	348	1536	88.264	705.084	1.577	0.634	0.931	0.5179	147677	1561	615.548	sib
12	487584	2921.38	0.718	1132.92	315	1494	86.66	661.773	1.66	0.602	0.895	0.5179	130780	1512.98	586.742	sib
13	587922	3245	0.702	1252.44	324	246	92.746	680.728	1.797	0.557	0.899	0.5179	157693	1680.59	648.638	sib
14	409959	2598.58	0.763	930.484	336	1404	88.152	632.693	1.488	0.672	0.896	0.5179	109960	1345.81	481.898	sib
15	395679	2655.5	0.705	996.289	327	1437	88.62	622.28	1.578	0.634	0.876	0.5179	106129	1375.28	515.979	sib
16	533602	3026.57	0.732	1129.62	306	1506	84.819	698.531	1.649	0.606	0.891	0.5179	143123	1567.46	585.028	sib
17	482607	2883.68	0.729	1014.54	333	435	91.864	716.536	1.491	0.671	0.888	0.5179	129445	1493.46	525.429	sib
18	326976	2410.2	0.707	915.044	264	465	96.589	562.333	1.635	0.612	0.886	0.5179	87701.8	1248.24	473.902	sib
19	458730	2763.43	0.755	1003.57	288	1413	82.96	711.38	1.42	0.704	0.902	0.5179	123041	1431.18	519.747	sib
20	497973	2847.92	0.772	1090.78	327	387	95.366	689.872	1.551	0.645	0.932	0.5179	133567	1474.94	564.916	sib
21	478022	2835.05	0.747	1028.96	351	1443	85.653	703.013	1.413	0.708	0.907	0.5179	128216	1468.27	532.899	sib
22	398982	2596.17	0.744	978.115	288	1431	85.426	622.994	1.56	0.641	0.9	0.5179	107015	1344.56	506.566	sib
23	478611	2893.27	0.718	1180.24	267	1524	87.378	616.502	1.803	0.555	0.925	0.5179	128373	1498.42	611.245	sib
24	519304	2992.85	0.729	1151.85	327	1491	85.968	683.588	1.628	0.614	0.923	0.5179	139288	1550	596.545	sib
25	524661	3051.41	0.708	1126.63	327	1509	84.806	719.569	1.577	0.634	0.875	0.5179	140725	1580.33	583.481	sib
26	484887	2882.57	0.733	1107.49	303	1449	88.293	634.459	1.744	0.573	0.902	0.5179	130057	1492.88	573.571	sib
27	340089	2474.08	0.698	839.839	306	1362	85.287	637.623	1.428	0.7	0.854	0.5179	91219	1281.33	434.953	sib
28	449031	2876.78	0.682	1123.45	294	1479	87.092	621.58	1.776	0.563	0.873	0.5179	120440	1489.88	581.834	sib
29	514602	2901.37	0.768	1125.58	309	1497	88.167	663.954	1.676	0.597	0.923	0.5179	138027	1502.62	582.936	sib
30	437001	2688.63	0.76	1001.74	279	1437	82.428	680.416	1.446	0.692	0.909	0.5179	117213	1392.44	518.799	sib
31	308931	2222.73	0.786	836.849	303	525	94.73	563.253	1.463	0.683	0.926	0.5179	82861.8	1151.15	433.405	sib
32	480912	2823.84	0.758	1023.53	369	408	91.848	714.812	1.462	0.684	0.904	0.5179	128991	1462.47	530.088	sib
33	451053	2716.09	0.768	1004.17	312	1401	86.231	673.933	1.425	0.702	0.911	0.5179	120982	1406.66	520.061	sib
34	456984	2729.57	0.771	1022.41	297	1437	84.105	675.718	1.465	0.682	0.92	0.5179	122573	1413.64	529.505	sib
35	456675	2805.08	0.729	971.12	273	1422	80.218	726.99	1.372	0.729	0.869	0.5179	122490	1452.75	502.944	sib
36	371727	2516.54	0.738	960.675	318	1368	87.852	583.819	1.591	0.629	0.904	0.5179	99705	1303.32	497.534	sib
37	485001	2954.74	0.698	1036.57	333	1464	86.848	719.306	1.542	0.649	0.876	0.5179	130087	1530.26	536.839	sib
38	379755	2521.1	0.751	964.494	273	459	97.147	614.468	1.523	0.657	0.915	0.5179	101858	1305.68	499.512	sib
39	416109	2587.26	0.781	918.97	264	1359	81.552	679.501	1.337	0.748	0.911	0.5179	111609	1339.94	475.935	sib
40	423456	2710.78	0.724	944.848	360	1431	82.153	724.392	1.378	0.726	0.864	0.5179	113580	1403.91	489.337	sib
41	491853	2915.58	0.727	1108.98	294	1470	84.567	664.907	1.671	0.599	0.895	0.5179	131925	1509.98	574.342	sib
42	433074	2710.28	0.741	979.329	336	1401	87.015	686.02	1.433	0.698	0.888	0.5179	116160	1403.66	507.195	sib
43	390186	2594.35	0.728	950.73	279	1401	85.657	627.273	1.505	0.664	0.881	0.5179	104656	1343.62	492.384	sib
44	270450	2045.91	0.812	739.924	270	525	98.393	510.445	1.389	0.72	0.943	N/A				mut
45	129777	1491.87	0.733	596.283	102	1212	73.936	336	1.668	0.6	0.922	N/A				mut
46	295866	2240.15	0.741	861.063	147	501	119.423	497.639	1.664	0.601	0.92	N/A				mut
47	595488	3450.5	0.629	1241.89	183	315	107.866	756.669	1.74	0.575	0.859	N/A				mut
48	217914	1860.41	0.791	700.563	147	552	106.417	454.072	1.388	0.72	0.946	N/A				mut
49	193074	1795.96	0.752	681.812	252	1257	83.938	427.147	1.581	0.633	0.92	N/A				mut
50	227148	1986.55	0.723	787.853	225	1329	86.07	414.444	1.964	0.509	0.917	N/A				mut
51	36417	854.28	0.627	318.904	87	774	94.316	160.209	1.986	0.504	0.868	N/A				mut
52	98193	1240.71	0.802	466.633	126	672	94.794	317.524	1.333	0.75	0.935	0.776851	59259.2	963.845	362.504	mut
53	162093	1652.25	0.746	647.868	192	594	97.717	396.09	1.563	0.64	0.91	0.776851	97822.6	1283.55	503.297	mut
54	201282	1913.31	0.691	777.069	117	531	107.526	394.926	1.964	0.509	0.892	0.776851	121473	1486.36	603.667	mut
55	581697	3527.18	0.588	1387.3	201	201	92.479	639.345	2.288	0.437	0.851	0.776851	351052	2740.1	1077.72	mut
56	21276	607.786	0.724	253.939	36	786	104.365	130.717	1.799	0.556	0.951	0.776851	12840	472.159	197.273	mut
57	422721	3056.35	0.569	1236.48	174	291	99.919	517.207	2.79	0.358	0.841	0.776851	255111	2374.32	960.563	mut
58	18834	616.231	0.623	273.247	39	780	98.842	105	2.363	0.423	0.947	0.776851	11366.3	478.719	212.272	mut
59	174825	1671.1	0.787	621.84	117	588	106.249	415.635	1.478	0.676	0.921	0.776851	105506	1298.2	483.077	mut
60	291183	2441.67	0.614	1008.93	180	426	112.371	469.535	2.302	0.434	0.888	0.776851	175728	1896.81	783.79	mut
61	917637	4599.42	0.545	1517.15	243	1620	79.979	1147.44	1.439	0.695	0.799	0.5179	246129	2382.04	785.731	mut
62	156969	1542.78	0.829	575.578	63	1176	63.034	408	1.399	0.715	0.945	0.5179	42102.4	799.009	298.092	mut
63	374013	2428.63	0.797	858.571	129	534	108.751	627.176	1.31	0.763	0.926	0.5179	100318	1257.79	444.654	mut
64	502740	2822.12	0.793	1060.7	348	390	93.243	702	1.489	0.672	0.941	0.5179	134845	1461.58	549.336	mut
65	396348	3158.11	0.499	1235.66	291	315	93.759	553.211	2.684	0.373	0.78	0.5179	106309	1635.59	639.948	mut
66	326490	2337.85	0.751	918.417	168	1359	78.507	552.082	1.587	0.63	0.921	0.5179	87571.5	1210.77	475.649	mut
67	192057	1906.53	0.664	744.883	144	564	101.853	425.285	1.685	0.593	0.874	0.5179	51513.7	987.39	385.775	mut
68	205260	1990.63	0.651	780.052	240	546	103.341	398.485	2.021	0.495	0.877	0.5179	55055	1030.95	403.989	mut
69	648993	4035.01	0.501	1353.98	507	1569	79.661	841.552	2.027	0.493	0.733	0.5179	174074	2089.73	701.229	mut
70	260112	2088.42	0.749	676.492	162	1260	72.449	561.742	1.332	0.751	0.899	0.5179	69767.5	1081.59	350.356	mut
71	217191	1976.02	0.699	804.274	213	1329	88.504	414.573	1.912	0.523	0.919	0.5179	58255.2	1023.38	416.534	mut
72	917514	4503.23	0.569	1758.79	429	60	102.211	805.654	2.516	0.397	0.823	0.5179	246096	2332.23	910.879	mut
73	258897	2203.13	0.67	850.165	219	1326	78.809	494.229	1.876	0.533	0.87	0.5179	69441.6	1141	440.301	mut
74	493872	2910.89	0.732	1093.98	318	1476	77.488	689.786	1.449	0.69	0.897	0.5179	132467	1507.55	566.573	mut
75	209949	1869.34	0.755	655.656	204	1260	70.487	509.383	1.248	0.801	0.898	0.5179	56312.7	968.132	339.565	mut
76	308865	2510.11	0.616	1051.22	69	468	111.953	455.289	2.664	0.375	0.905	0.5179	82844.1	1299.99	544.43	mut
77	198864	1877.27	0.709	737.347	129	585	107.034	431.772	1.662	0.602	0.904	0.5179	53339.5	972.24	381.872	mut
78	291813	2349.26	0.664	996.668	231	405	101.107	420.649	2.331	0.429	0.947	0.5179	78270.4	1216.68	516.175	mut
79	122499	1448.24	0.734	555.81	174	1179	86.906	340.756	1.383	0.723	0.918	0.5179	32856.8	750.045	287.854	mut
80	478320	2812.26	0.76	1080.7	252	1425	87.932	632.015	1.869	0.535	0.917	0.5179	128295	1456.47	559.697	mut
81	623847	3296.92	0.721	1082.6	189	393	122.897	849.763	1.247	0.802	0.876	0.5179	167329	1707.48	560.68	mut
82	175008	1815.8	0.667	754.689	183	486	96.39	352.146	1.925	0.519	0.925	0.5179	46940.8	940.406	390.854	mut
83	315366	2440.37	0.665	908.401	315	435	94.167	546.146	1.86	0.538	0.877	0.5179	84587.8	1263.87	470.461	mut
84	101142	1369.32	0.678	531.034	153	654	90.647	310.844	1.812	0.552	0.86	0.5179	27128.4	709.171	275.023	mut
85	361086	2470.55	0.743	891.045	291	468	90.579	636.002	1.308	0.765	0.893	0.5179	96850.8	1279.5	461.473	mut
86	156681	1618.83	0.751	598.746	225	1185	70.385	386.393	1.482	0.675	0.934	0.5179	42025.1	838.392	310.091	mut
87	176475	1995.96	0.557	785.519	210	1305	71.288	359.819	2.441	0.41	0.845	0.5179	47334.3	1033.71	406.821	mut
88	357894	2654.08	0.638	1079.12	330	1422	84.416	520.229	2.184	0.458	0.864	0.5179	95994.7	1374.55	558.877	mut
89	210384	1848.55	0.774	650.53	156	606	99.289	452.671	1.359	0.736	0.912	0.5179	56429.4	957.364	336.91	mut
90	703230	4096.01	0.527	1729.33	192	159	121.594	571.526	3.097	0.323	0.877	0.5179	188621	2121.33	895.618	mut
91	66864	1094.74	0.701	390.427	84	714	116.959	227.776	1.681	0.595	0.923	0.5179	17934.3	566.968	202.202	mut
92	477108	2938.53	0.694	1085.12	177	402	119.116	589.666	1.736	0.576	0.925	0.5179	127970	1521.87	561.985	mut
