# Supplementary material for: Dermal appendage-dependent patterning of zebrafish atoh1a+ Merkel cells
Source: eLife. 2023 Jan 17;12:e85800. doi: 10.7554/eLife.85800 (PMC9901935; doi:10.7554/eLife.85800)
Supplement: Figure 9—figure supplement 1—source data 2. [file elife-85800-fig9-figsupp1-data2.xlsx]

## Sheet: FIG 9-S1D
treatment	size	density
mut	13.47	390.465
mut	14.2	803.159
mut	13.2	419.897
mut	13.35	567.497
mut	13.35	531.652
mut	14.69	852.04
mut	14.69	1097.09
mut	13.13	873.255
mut	12.37	462.995
mut	12.96	864.659
mut	13.87	1091.69
mut	11.91	518.655
sib	12.19	628.467
sib	12.45	490.702
sib	13.39	604.034
sib	13.18	1099.86
sib	12.29	1159.74
sib	11.6	600.723
sib	11.6	500.95
sib	14.2	1235.46
sib	13.96	1226.15
sib	12.37	1126.77
sib	12.62	833.532
sib	13.09	995.824
sib	13.41	1201.94
sib	13.28	812.439
sib	14.05	510.105
