# Supplementary material for: Dermal appendage-dependent patterning of zebrafish atoh1a+ Merkel cells
Source: eLife. 2023 Jan 17;12:e85800. doi: 10.7554/eLife.85800 (PMC9901935; doi:10.7554/eLife.85800)
Supplement: Figure 9—figure supplement 1—source data 3. [file elife-85800-fig9-figsupp1-data3.xlsx]

## Sheet: clean hagoromo analysis 5.2021 
treatment	size	scale	density
hagoromo	13.47	1	1448.01
hagoromo	13.47	2	258.573
hagoromo	13.47	3	568.861
hagoromo	13.47	4	775.72
hagoromo	13.47	5	775.72
hagoromo	13.47	6	1034.29
hagoromo	13.47	7	672.29
hagoromo	13.47	8	517.146
hagoromo	13.47	9	465.432
hagoromo	13.47	10	930.863
hagoromo	14.2	1	2068.59
hagoromo	14.2	2	1137.72
hagoromo	14.2	3	1603.15
hagoromo	14.2	4	1551.44
hagoromo	14.2	5	1086.01
hagoromo	14.2	6	1551.44
hagoromo	14.2	7	1292.87
hagoromo	14.2	8	1810.01
hagoromo	14.2	9	1810.01
hagoromo	14.2	10	1706.58
hagoromo	14.2	11	1137.72
hagoromo	14.2	12	1344.58
hagoromo	14.2	13	1448.01
hagoromo	13.2	1	964.545
hagoromo	13.2	2	812.249
hagoromo	13.2	3	1066.08
hagoromo	13.2	4	964.545
hagoromo	13.2	5	355.359
hagoromo	13.2	6	863.014
hagoromo	13.35	1	1269.14
hagoromo	13.35	2	1066.08
hagoromo	13.35	3	1421.43
hagoromo	13.35	4	1624.5
hagoromo	13.35	5	1015.31
hagoromo	13.35	6	812.249
hagoromo	13.35	7	761.483
hagoromo	14.69	1	1218.37
hagoromo	14.69	2	1726.03
hagoromo	14.69	3	1421.43
hagoromo	14.69	4	1726.03
hagoromo	14.69	5	2030.62
hagoromo	14.69	6	1979.86
hagoromo	14.69	7	1878.32
hagoromo	14.69	8	2385.98
hagoromo	14.69	9	1573.73
hagoromo	13.13	1	2639.81
hagoromo	13.13	2	1624.5
hagoromo	13.13	3	1878.32
hagoromo	13.13	4	1726.03
hagoromo	13.13	5	2233.68
hagoromo	13.13	6	1218.37
hagoromo	13.13	7	1319.9
hagoromo	13.13	8	1522.97
hagoromo	13.13	9	913.78
hagoromo	12.37	1	1116.84
hagoromo	12.37	2	355.359
hagoromo	12.37	3	964.545
hagoromo	12.37	4	3782.03
hagoromo	12.37	5	659.952
hagoromo	12.37	6	659.952
hagoromo	12.37	7	203.062
hagoromo	12.96	1	1827.56
hagoromo	12.96	2	1269.14
hagoromo	12.96	3	2436.75
hagoromo	12.96	4	1675.26
hagoromo	12.96	5	2385.98
hagoromo	12.96	6	2487.51
hagoromo	12.96	7	1218.37
hagoromo	12.96	8	1573.73
hagoromo	12.96	9	1421.43
hagoromo	13.87	1	1472.2
hagoromo	13.87	2	1522.97
hagoromo	13.87	3	2589.04
hagoromo	13.87	4	3096.7
hagoromo	13.87	5	2741.34
hagoromo	13.87	6	1726.03
hagoromo	13.87	7	1116.84
hagoromo	13.87	8	964.545
hagoromo	11.91	1	1319.9
hagoromo	11.91	2	1167.61
hagoromo	11.91	3	913.78
hagoromo	11.91	4	304.593
hagoromo	11.91	5	761.483
hagoromo	11.91	6	609.186
hagoromo	11.91	7	609.186
hagoromo	11.91	8	812.249
hagoromo	11.91	9	1116.84
siblings	12.19	1	1116.84
siblings	12.19	2	1269.14
siblings	12.19	3	964.545
siblings	12.19	4	710.717
siblings	12.19	5	964.545
siblings	12.19	6	1269.14
siblings	12.19	7	761.483
siblings	12.45	1	1370.67
siblings	12.45	2	812.249
siblings	12.45	3	507.655
siblings	12.45	4	1319.9
siblings	12.45	5	761.483
siblings	12.45	6	761.483
siblings	13.39	1	1269.14
siblings	13.39	2	1015.31
siblings	13.39	3	659.952
siblings	13.39	4	659.952
siblings	13.39	5	609.186
siblings	13.39	6	1015.31
siblings	13.39	7	863.014
siblings	13.39	8	507.655
siblings	13.18	1	1675.26
siblings	13.18	2	1878.32
siblings	13.18	3	1878.32
siblings	13.18	4	2132.15
siblings	13.18	5	1319.9
siblings	13.18	6	2538.28
siblings	12.29	1	1726.03
siblings	12.29	2	1675.26
siblings	12.29	3	1675.26
siblings	12.29	4	1624.5
siblings	12.29	5	1827.56
siblings	12.29	6	1421.43
siblings	12.29	7	1472.2
siblings	12.29	8	2182.92
siblings	12.29	9	1929.09
siblings	12.29	10	1878.32
siblings	11.6	1	761.483
siblings	11.6	2	1370.67
siblings	11.6	3	1269.14
siblings	11.6	4	964.545
siblings	11.6	5	1522.97
siblings	11.6	6	1066.08
siblings	11.6	7	1015.31
siblings	11.6	8	761.483
siblings	11.6	9	863.014
siblings	14.2	1	2741.34
siblings	14.2	2	2081.39
siblings	14.2	3	1472.2
siblings	14.2	4	1979.86
siblings	14.2	5	2792.1
siblings	14.2	6	1726.03
siblings	13.96	1	2233.68
siblings	13.96	2	2335.21
siblings	13.96	3	1472.2
siblings	13.96	4	1979.86
siblings	13.96	5	1827.56
siblings	13.96	6	1421.43
siblings	12.37	1	1776.79
siblings	12.37	2	1776.79
siblings	12.37	3	1979.86
siblings	12.37	4	1472.2
siblings	12.37	5	1015.31
siblings	12.37	6	2132.15
siblings	12.37	7	1827.56
siblings	12.62	1	1421.43
siblings	12.62	2	1269.14
siblings	12.62	3	1573.73
siblings	12.62	4	1421.43
siblings	12.62	5	1624.5
siblings	12.62	6	2132.15
siblings	12.62	7	812.249
siblings	12.62	8	1116.84
siblings	12.62	9	1167.61
siblings	12.62	10	863.014
siblings	13.09	1	1776.79
siblings	13.09	2	2487.51
siblings	13.09	3	1929.09
siblings	13.09	4	1624.5
siblings	13.09	5	1015.31
siblings	13.09	6	1370.67
siblings	13.09	7	1218.37
siblings	13.41	1	2741.34
siblings	13.41	2	1827.56
siblings	13.41	3	2132.15
siblings	13.41	4	2436.75
siblings	13.41	5	2436.75
siblings	13.41	6	1776.79
siblings	13.41	7	2132.15
siblings	13.41	8	1421.43
siblings	13.41	9	2385.98
siblings	13.28	1	1319.9
siblings	13.28	2	1218.37
siblings	13.28	3	1726.03
siblings	13.28	4	1472.2
siblings	13.28	5	1827.56
siblings	13.28	6	1319.9
siblings	13.28	7	1675.26
siblings	13.28	8	2030.62
siblings	14.05	1	659.952
siblings	14.05	2	1066.08
siblings	14.05	3	761.483
siblings	14.05	4	964.545
siblings	14.05	5	659.952
siblings	14.05	6	812.249
