# Supplementary material for: Dermal appendage-dependent patterning of zebrafish atoh1a+ Merkel cells
Source: eLife. 2023 Jan 17;12:e85800. doi: 10.7554/eLife.85800 (PMC9901935; doi:10.7554/eLife.85800)
Supplement: Figure 9—source data 1. [file elife-85800-fig9-data1.xlsx]

## Sheet: all coords
X	Y	type	Xm	Ym	micron coeff
233.294	603.5	mut			N/A
293.786	634.5	mut			N/A
221.917	640.944	mut			N/A
252.41	669.82	mut			N/A
382.333	679.125	mut			N/A
320.533	689.633	mut			N/A
291.886	692.886	mut			N/A
177.909	697.303	mut			N/A
207.875	701.25	mut			N/A
265.895	705.211	mut			N/A
295.704	706.222	mut			N/A
419.238	721.619	mut			N/A
313.667	731.2	mut			N/A
52.667	736.2	mut			N/A
242.217	737.087	mut			N/A
366	737.818	mut			N/A
306.707	759.073	mut			N/A
417.357	770.536	mut			N/A
230.659	788.024	mut			N/A
127.29	792.71	mut			N/A
86.188	796.312	mut			N/A
160.675	801.85	mut			N/A
187.824	801.353	mut			N/A
292.909	805.303	mut			N/A
265.524	816.571	mut			N/A
239.5	818.667	mut			N/A
324.872	825.872	mut			N/A
61	825.5	mut			N/A
429.08	827.2	mut			N/A
291.879	829.061	mut			N/A
354.346	847.654	mut			N/A
148.633	852.633	mut			N/A
278.793	852	mut			N/A
303.429	852.943	mut			N/A
109.297	855.865	mut			N/A
195.478	855.348	mut			N/A
84.176	866.5	mut			N/A
310.028	864.917	mut			N/A
444.111	865.333	mut			N/A
224.185	872.185	mut			N/A
290.633	875.633	mut			N/A
120.615	878.885	mut			N/A
241.882	879.235	mut			N/A
65	879.5	mut			N/A
369.826	880	mut			N/A
213.895	886.211	mut			N/A
138.757	886.757	mut			N/A
332	890.708	mut			N/A
203.586	893.724	mut			N/A
271.29	894.29	mut			N/A
245.667	903.2	mut			N/A
368.1	906.8	mut			N/A
145.88	908.8	mut			N/A
182.595	909.513	mut			N/A
218	916	mut			N/A
157.103	921.359	mut			N/A
105.333	924.9	mut			N/A
332.633	927.367	mut			N/A
206.111	931.289	mut			N/A
453.619	930	mut			N/A
301.1	932.45	mut			N/A
252	933.857	mut			N/A
427.406	937.125	mut			N/A
153.469	942.219	mut			N/A
228.884	952.047	mut			N/A
348.375	951.125	mut			N/A
278.318	955.705	mut			N/A
176.972	962.083	mut			N/A
130.095	966.905	mut			N/A
420.2	971.56	mut			N/A
337.533	973.133	mut			N/A
268.9	987.05	mut			N/A
311.367	992.367	mut			N/A
200.5	994.333	mut			N/A
452.136	995.455	mut			N/A
172.452	997.419	mut			N/A
485.8	1003	mut			N/A
336.565	1012.91	mut			N/A
222.318	1014.86	mut			N/A
378.895	1016.42	mut			N/A
133.8	1019.33	mut			N/A
308.174	1019.43	mut			N/A
260.5	1024	mut			N/A
200	1027	mut			N/A
393	1034.83	mut			N/A
264.318	1041.05	mut			N/A
340.579	1051.11	mut			N/A
247.385	1053.27	mut			N/A
134.952	1058.81	mut			N/A
285.955	1058.73	mut			N/A
192.5	1063.5	mut			N/A
361.292	1063.54	mut			N/A
314.633	1064.37	mut			N/A
169.769	1071.85	mut			N/A
217.393	1071.18	mut			N/A
146.308	1082.27	mut			N/A
247.323	1085.9	mut			N/A
282.679	1085.25	mut			N/A
198.5	1086.5	mut			N/A
452.941	1088.18	mut			N/A
278.621	1096.59	mut			N/A
220.481	1102.11	mut			N/A
309.92	1104.2	mut			N/A
404.304	1111.26	mut			N/A
430.5	1111.5	mut			N/A
187.5	1118.5	mut			N/A
351.92	1118.8	mut			N/A
327.391	1122.04	mut			N/A
156.5	1124	mut			N/A
223.6	1124.17	mut			N/A
390.318	1128.09	mut			N/A
172.912	1145.03	mut			N/A
287.464	1144.36	mut			N/A
358.885	1159.31	mut			N/A
214.724	1171.59	mut			N/A
287.276	1184.17	mut			N/A
216.826	1186	mut			N/A
398.724	1191.59	mut			N/A
222.469	695.656	mut			N/A
233	717.171	mut			N/A
240.682	765.182	mut			N/A
150.088	783.853	mut			N/A
194	786.714	mut			N/A
142.393	803.821	mut			N/A
128.088	809.794	mut			N/A
207.571	816.229	mut			N/A
170.364	820.939	mut			N/A
231.625	822.344	mut			N/A
170.5	840.833	mut			N/A
153.742	841.387	mut			N/A
220.969	843.969	mut			N/A
143.459	852.919	mut			N/A
260.385	876.5	mut			N/A
95.909	877.697	mut			N/A
156.5	885.5	mut			N/A
177.903	894.677	mut			N/A
100.393	900.821	mut			N/A
140.105	902.789	mut			N/A
226.706	908.5	mut			N/A
118.091	913.697	mut			N/A
177.714	916.5	mut			N/A
204.519	921.889	mut			N/A
139	927.5	mut			N/A
165.057	937.657	mut			N/A
187.464	937.643	mut			N/A
283.786	940.5	mut			N/A
129.367	944.367	mut			N/A
228.581	946.548	mut			N/A
310.548	955.581	mut			N/A
110.861	957.389	mut			N/A
236.286	959.429	mut			N/A
198.167	963.8	mut			N/A
139.414	971.276	mut			N/A
180.586	981.724	mut			N/A
73.038	982.308	mut			N/A
127.892	983.135	mut			N/A
156.162	995.405	mut			N/A
225	996.265	mut			N/A
197.917	1001.92	mut			N/A
179.633	1006.63	mut			N/A
67.68	1009.76	mut			N/A
138.842	1012.79	mut			N/A
111.407	1018.93	mut			N/A
210.935	1020.42	mut			N/A
276	1023.5	mut			N/A
137	1035.88	mut			N/A
165.188	1036.72	mut			N/A
63.478	1044.39	mut			N/A
192.706	1044.5	mut			N/A
157.533	1046.87	mut			N/A
106.097	1049.13	mut			N/A
221.083	1049.5	mut			N/A
159.028	1056.08	mut			N/A
130.5	1063.5	mut			N/A
211.5	1065.5	mut			N/A
153.217	1068.91	mut			N/A
175.96	1084.6	mut			N/A
119.593	1094.93	mut			N/A
180.579	1098.11	mut			N/A
154.407	1099.26	mut			N/A
83.864	1114.23	mut			N/A
147	1122.29	mut			N/A
156.5	634.2	mut			N/A
325.875	639.688	mut			N/A
187.75	675.562	mut			N/A
286.154	683.615	mut			N/A
201.615	686.385	mut			N/A
130.522	690.391	mut			N/A
210.407	704.926	mut			N/A
159.909	712.091	mut			N/A
301.586	716.276	mut			N/A
272.5	724.5	mut			N/A
422	728	mut			N/A
192.5	729	mut			N/A
344.382	732.147	mut			N/A
171.13	733.783	mut			N/A
84.455	735.636	mut			N/A
321.394	743.485	mut			N/A
136.118	744.588	mut			N/A
196.5	754.273	mut			N/A
129.346	755.346	mut			N/A
427.156	755.625	mut			N/A
258.13	762.783	mut			N/A
299.156	762.594	mut			N/A
390.708	763	mut			N/A
471	772	mut			N/A
327	775	mut			N/A
221.194	778.694	mut			N/A
178.895	784.421	mut			N/A
363.861	803.389	mut			N/A
387.5	805.5	mut			N/A
254	807.826	mut			N/A
315.156	828.375	mut			N/A
87.167	832.167	mut			N/A
225.111	833.056	mut			N/A
58.842	836.842	mut			N/A
350.97	840.182	mut			N/A
99.633	842.633	mut			N/A
416.771	843.429	mut			N/A
439.714	846.429	mut			N/A
282.81	852.143	mut			N/A
119.5	859.5	mut			N/A
358.5	859.5	mut			N/A
230.962	860.308	mut			N/A
148.75	861.75	mut			N/A
518.5	863.5	mut			N/A
135.04	869.6	mut			N/A
306.719	871.188	mut			N/A
259.742	871.613	mut			N/A
458	871.174	mut			N/A
481.25	871.05	mut			N/A
426.943	874.657	mut			N/A
165.786	878.5	mut			N/A
333.065	884.581	mut			N/A
385.091	884.667	mut			N/A
204.364	890.318	mut			N/A
332.919	901.541	mut			N/A
240	902	mut			N/A
285.391	902.783	mut			N/A
77.125	905.667	mut			N/A
407.167	905.5	mut			N/A
123.842	914.842	mut			N/A
29.615	915.385	mut			N/A
200.452	920.419	mut			N/A
458.7	919.8	mut			N/A
541.375	927.156	mut			N/A
133.593	937.37	mut			N/A
179.056	942.111	mut			N/A
263.091	946.697	mut			N/A
446.861	946.389	mut			N/A
438.771	957.029	mut			N/A
538.111	957.518	mut			N/A
212	967.265	mut			N/A
283.825	973.05	mut			N/A
204	973.5	mut			N/A
254.414	977.931	mut			N/A
467.242	985.424	mut			N/A
311.657	991.286	mut			N/A
179.24	992.32	mut			N/A
495.333	994.875	mut			N/A
410.7	997.825	mut			N/A
445.045	999.909	mut			N/A
380.872	1002.13	mut			N/A
282.909	1014.7	mut			N/A
232.724	1018.83	mut			N/A
429.179	1022.39	mut			N/A
334.778	1026.33	mut			N/A
407.548	1028.58	mut			N/A
473.091	1028.7	mut			N/A
174.115	1034.96	mut			N/A
300.054	1037.13	mut			N/A
519.103	1038.52	mut			N/A
252.675	1043.85	mut			N/A
216.692	1043.96	mut			N/A
378.389	1050.75	mut			N/A
350.5	1052	mut			N/A
469.842	1066.21	mut			N/A
302.593	1065.93	mut			N/A
277.667	1068.5	mut			N/A
369.41	1071.33	mut			N/A
422	1079.59	mut			N/A
430.842	1095.79	mut			N/A
474.3	1107	mut			N/A
437.815	1108.07	mut			N/A
345.629	1129.57	mut			N/A
315	1134.66	mut			N/A
345.909	1149.3	mut			N/A
446.35	1156.6	mut			N/A
366.452	1163.42	mut			N/A
478.051	1165.72	mut			N/A
414.424	1167.42	mut			N/A
441.29	1185.29	mut			N/A
374.1	1192.05	mut			N/A
413.667	1202.88	mut			N/A
448.353	1210	mut			N/A
125.091	476.909	mut			N/A
72.818	478.818	mut			N/A
83.367	488.367	mut			N/A
96.4	498.182	mut			N/A
115.885	501.654	mut			N/A
171	503.5	mut			N/A
20.826	510	mut			N/A
40.292	512	mut			N/A
103.333	515.111	mut			N/A
153.125	516.333	mut			N/A
79.571	519.771	mut			N/A
70.419	521.548	mut			N/A
377.71	523.613	mut			N/A
125.344	525.594	mut			N/A
37.656	532.625	mut			N/A
178.538	535.846	mut			N/A
570.312	540.594	mut			N/A
139.158	540.842	mut			N/A
204.946	542.676	mut			N/A
269.429	543.714	mut			N/A
83	545	mut			N/A
353.708	546.208	mut			N/A
37.943	549.429	mut			N/A
125.667	549.111	mut			N/A
213.325	552.925	mut			N/A
80	554	mut			N/A
67.875	555.667	mut			N/A
147	554.714	mut			N/A
108.593	557.074	mut			N/A
150.833	556	mut			N/A
59.5	560.5	mut			N/A
118.24	562.4	mut			N/A
28	564.594	mut			N/A
86.034	564.655	mut			N/A
156.696	565.783	mut			N/A
214.857	564.929	mut			N/A
333.667	569.083	mut			N/A
464.926	573.593	mut			N/A
96.091	575.788	mut			N/A
134.7	574.25	mut			N/A
525.318	575.364	mut			N/A
207.6	577.55	mut			N/A
160.5	581	mut			N/A
167.75	582.55	mut			N/A
153.5	589	mut			N/A
309.75	594.375	mut			N/A
386.079	596.947	mut			N/A
132.958	598.604	mut			N/A
21.533	601.633	mut			N/A
465	607.5	mut			N/A
127.909	608.909	mut			N/A
209.833	610.792	mut			N/A
435.889	617.482	mut			N/A
188.706	618.5	mut			N/A
482.4	620.04	mut			N/A
94.742	622.645	mut			N/A
165	622	mut			N/A
355.4	625.4	mut			N/A
313.065	628.226	mut			N/A
19.722	628.833	mut			N/A
591.062	628.312	mut			N/A
95.419	631.258	mut			N/A
80.24	638.2	mut			N/A
132.586	638.724	mut			N/A
162.361	638.972	mut			N/A
606.5	639.083	mut			N/A
57.2	650.08	mut			N/A
443.901	654.845	mut			N/A
136.129	655.71	mut			N/A
208.091	656.091	mut			N/A
66.071	658.071	mut			N/A
118.414	665.414	mut			N/A
470.407	674.259	mut			N/A
74.633	682.633	mut			N/A
424.1	695.05	mut			N/A
63.286	695.429	mut			N/A
105.724	697.414	mut			N/A
505.294	706.5	mut			N/A
386.5	710	mut			N/A
193.541	719.919	mut			N/A
122.625	723.156	mut			N/A
250.5	731.294	mut			N/A
84.833	731.167	mut			N/A
306.771	734.571	mut			N/A
494.531	735.656	mut			N/A
385.867	742.533	mut			N/A
460.179	751.643	mut			N/A
177.686	757.686	mut			N/A
421.324	761.059	mut			N/A
354.321	764.321	mut			N/A
573.379	765.586	mut			N/A
101.783	773.087	mut			N/A
168.611	783.139	mut			N/A
139.611	783.861	mut			N/A
123.5	787	mut			N/A
292.1	787.95	mut			N/A
605.833	796.125	mut			N/A
249.387	800.742	mut			N/A
345.359	806.897	mut			N/A
112.424	808.576	mut			N/A
426.861	815.611	mut			N/A
297.943	818.114	mut			N/A
365	817.417	mut			N/A
528.9	819.1	mut			N/A
184.079	824.447	mut			N/A
225.571	827.114	mut			N/A
661.914	834.314	mut			N/A
154.658	836.421	mut			N/A
755.292	837	mut			N/A
369.8	840.92	mut			N/A
417.345	841.724	mut			N/A
712.469	845.656	mut			N/A
449.767	850.533	mut			N/A
252.935	857.355	mut			N/A
144.471	860.882	mut			N/A
640.556	859.667	mut			N/A
167.706	865.5	mut			N/A
426.886	869.114	mut			N/A
701	871	mut			N/A
134.167	870	mut			N/A
378.028	873.083	mut			N/A
292.229	875.429	mut			N/A
322.897	876.172	mut			N/A
78.581	876.871	mut			N/A
212.2	877.733	mut			N/A
198.8	878	mut			N/A
253.367	880.633	mut			N/A
458.114	884.114	mut			N/A
430.621	894.138	mut			N/A
372.432	896.568	mut			N/A
521.975	900.325	mut			N/A
640.25	898.667	mut			N/A
481.914	902.8	mut			N/A
231.5	904.5	mut			N/A
141.789	906.158	mut			N/A
395.667	906.833	mut			N/A
253.581	911.065	mut			N/A
432	910	mut			N/A
119.962	914.641	mut			N/A
706.29	913.29	mut			N/A
677.607	915.179	mut			N/A
294.407	917.259	mut			N/A
206.128	919.974	mut			N/A
416.5	923.5	mut			N/A
486.889	924.556	mut			N/A
325.64	926.76	mut			N/A
105.438	927.688	mut			N/A
350.771	934.429	mut			N/A
522.229	934.429	mut			N/A
571.703	934.865	mut			N/A
270.676	942.412	mut			N/A
155.844	943.625	mut			N/A
312.5	944.214	mut			N/A
433.806	945.056	mut			N/A
600.5	945.353	mut			N/A
86.781	946.938	mut			N/A
379.756	949	mut			N/A
400.756	950	mut			N/A
217.171	952.257	mut			N/A
122.5	955	mut			N/A
670.909	958.303	mut			N/A
753.333	961.8	mut			N/A
508.333	963.5	mut			N/A
447.162	966.405	mut			N/A
476	966	mut			N/A
241	964.5	mut			N/A
463.625	966.562	mut			N/A
299.367	969.633	mut			N/A
150.174	971	mut			N/A
120.846	975.615	mut			N/A
348.533	975.533	mut			N/A
232.243	978.189	mut			N/A
388.5	977.727	mut			N/A
493.143	991.19	mut			N/A
361.724	992.345	mut			N/A
450.054	993.432	mut			N/A
553.147	994.088	mut			N/A
195.654	996	mut			N/A
638.5	996	mut			N/A
318.25	998.806	mut			N/A
153.088	1003.19	mut			N/A
425.079	1009.05	mut			N/A
537.5	1011.83	mut			N/A
164.718	1018.82	mut			N/A
192.259	1018.59	mut			N/A
341.633	1023.37	mut			N/A
396.853	1024.38	mut			N/A
230.571	1040.77	mut			N/A
412.367	1040.63	mut			N/A
378	1046.24	mut			N/A
433.297	1046.13	mut			N/A
318	1047.68	mut			N/A
110.967	1049.1	mut			N/A
287.576	1050.58	mut			N/A
624.757	1052.24	mut			N/A
120	1052.5	mut			N/A
266.158	1053.79	mut			N/A
234.889	1055.52	mut			N/A
203.217	1056.91	mut			N/A
578.952	1060.9	mut			N/A
548	1065.21	mut			N/A
298	1069.17	mut			N/A
474.708	1069	mut			N/A
244.903	1075.32	mut			N/A
282.276	1075.41	mut			N/A
447	1077	mut			N/A
385.675	1080.03	mut			N/A
339.5	1084.66	mut			N/A
409	1086.5	mut			N/A
426	1089.24	mut			N/A
498.757	1090.76	mut			N/A
163.5	1092	mut			N/A
291.706	1093.5	mut			N/A
322.424	1095.42	mut			N/A
658.769	1099.54	mut			N/A
360.917	1101.11	mut			N/A
447.419	1104.55	mut			N/A
406.389	1107.14	mut			N/A
338.606	1112.52	mut			N/A
292.393	1118.82	mut			N/A
564.393	1123.18	mut			N/A
607	1123.83	mut			N/A
260.917	1125.03	mut			N/A
168.75	1125.05	mut			N/A
190.8	1125.47	mut			N/A
278.718	1128.1	mut			N/A
319.424	1136.42	mut			N/A
245.188	1138.72	mut			N/A
401.091	1139.91	mut			N/A
450.5	1147	mut			N/A
197.656	1151	mut			N/A
475.846	1153.38	mut			N/A
310.882	1154.94	mut			N/A
266.771	1155.63	mut			N/A
544.324	1157.41	mut			N/A
589.794	1161.09	mut			N/A
350.375	1164.62	mut			N/A
248.654	1168.65	mut			N/A
457.5	1168.5	mut			N/A
491.697	1170.09	mut			N/A
568.29	1170.29	mut			N/A
475.5	1173	mut			N/A
325.742	1182.36	mut			N/A
612.485	1182.61	mut			N/A
292.609	1191.78	mut			N/A
583.029	1193.91	mut			N/A
462.111	1193.67	mut			N/A
327.593	1197.07	mut			N/A
441	1202	mut			N/A
523.571	1203.23	mut			N/A
234.654	1205.65	mut			N/A
378.909	1205.27	mut			N/A
422.375	1206.25	mut			N/A
301.971	1209.91	mut			N/A
268	1210.67	mut			N/A
376	1223.5	mut			N/A
423	1225.5	mut			N/A
469.214	1226.5	mut			N/A
578.414	1227.72	mut			N/A
328.972	1231.92	mut			N/A
250.31	1232.55	mut			N/A
433.414	1242.72	mut			N/A
536.684	1246.03	mut			N/A
375.515	1247.73	mut			N/A
356.625	1255.16	mut			N/A
404.812	1254.28	mut			N/A
484.61	1257.17	mut			N/A
277.548	1259.42	mut			N/A
452.467	1264.33	mut			N/A
384	1264.83	mut			N/A
529.091	1266.7	mut			N/A
409.667	1271.04	mut			N/A
460.722	1271.39	mut			N/A
313.121	1276.06	mut			N/A
286.571	1278.71	mut			N/A
480.12	1279.64	mut			N/A
339.333	1283.78	mut			N/A
524.935	1285.42	mut			N/A
431.5	1290.5	mut			N/A
460.912	1295.03	mut			N/A
408.59	1297.49	mut			N/A
393.364	1301.94	mut			N/A
362.088	1306.79	mut			N/A
554.061	1309.36	mut			N/A
695.125	1313.67	mut			N/A
598.633	1314.63	mut			N/A
507.139	1315.39	mut			N/A
444.211	1319.11	mut			N/A
487.675	1320.03	mut			N/A
393.071	1326.43	mut			N/A
312.393	1329.96	mut			N/A
388.105	1335.21	mut			N/A
360.344	1335.47	mut			N/A
442.935	1338.42	mut			N/A
511.176	1345.65	mut			N/A
537.633	1347.37	mut			N/A
341.138	1350.59	mut			N/A
504.135	1355.3	mut			N/A
435.872	1362.13	mut			N/A
391.091	1375.3	mut			N/A
504.771	1379.57	mut			N/A
439.733	1390.8	mut			N/A
571.8	1392.2	mut			N/A
420.367	1400.37	mut			N/A
487	1402.24	mut			N/A
543	1402.73	mut			N/A
603.56	1404.32	mut			N/A
521.125	1411.33	mut			N/A
625.455	1413.24	mut			N/A
527.875	1418.88	mut			N/A
582.294	1433.29	mut			N/A
477.333	1448.47	mut			N/A
149.043	650.391	mut			N/A
180.5	670.333	mut			N/A
148.519	673.111	mut			N/A
158.25	677.438	mut			N/A
220.5	685.786	mut			N/A
141.242	688.424	mut			N/A
119.105	689.579	mut			N/A
138	707.5	mut			N/A
158.9	712.05	mut			N/A
96.636	713.318	mut			N/A
241.115	714	mut			N/A
188.414	717.724	mut			N/A
307.276	718.586	mut			N/A
142.136	725.455	mut			N/A
151.926	739.407	mut			N/A
220.407	739.259	mut			N/A
125.5	751.2	mut			N/A
166.5	750.5	mut			N/A
103.2	759.88	mut			N/A
82	762.857	mut			N/A
201.381	765.429	mut			N/A
146.259	768.593	mut			N/A
122.633	773.367	mut			N/A
205.5	785.5	mut			N/A
265.31	785.897	mut			N/A
292.654	789.654	mut			N/A
119.806	792	mut			N/A
91.229	796.571	mut			N/A
166.771	796.429	mut			N/A
211.194	811.71	mut			N/A
98.5	817.353	mut			N/A
267.5	818.647	mut			N/A
193.105	824.632	mut			N/A
312.5	832.5	mut			N/A
234.8	835.4	mut			N/A
130.833	836.5	mut			N/A
293.154	836.615	mut			N/A
141.026	848.658	mut			N/A
210.727	851.5	mut			N/A
269.909	851.697	mut			N/A
328.759	852.241	mut			N/A
230.861	853.611	mut			N/A
191.771	857.429	mut			N/A
377.962	858.308	mut			N/A
412.6	859.4	mut			N/A
71.5	863.5	mut			N/A
138.607	873.821	mut			N/A
198	874.344	mut			N/A
338.179	875.607	mut			N/A
154.405	880.838	mut			N/A
413.333	884.857	mut			N/A
177.757	888.243	mut			N/A
270.548	889.581	mut			N/A
450.048	902.19	mut			N/A
111.44	910.08	mut			N/A
274	911.344	mut			N/A
13.833	912.433	mut			N/A
161.424	918.576	mut			N/A
237.389	922.139	mut			N/A
313	926.5	mut			N/A
184.667	926.875	mut			N/A
199.108	928.973	mut			N/A
473	929.25	mut			N/A
287.706	935.5	mut			N/A
395.875	935.333	mut			N/A
154.576	936.576	mut			N/A
266.486	939.743	mut			N/A
120.692	943.5	mut			N/A
359.586	946.276	mut			N/A
338.367	952.833	mut			N/A
202.237	956.711	mut			N/A
304.5	962.5	mut			N/A
384.826	969	mut			N/A
359.25	975.667	mut			N/A
259.95	979.9	mut			N/A
268	978.714	mut			N/A
328.974	986.744	mut			N/A
225.718	998.077	mut			N/A
261.286	1000.57	mut			N/A
164.7	1004.2	mut			N/A
134.706	1016.5	mut			N/A
359.833	1016.83	mut			N/A
102.548	1021.71	mut			N/A
223.469	1026.34	mut			N/A
301.054	1027.43	mut			N/A
65.061	1028.33	mut			N/A
264.816	1032.08	mut			N/A
134.857	1034.71	mut			N/A
360.862	1041.59	mut			N/A
168.771	1046.57	mut			N/A
212.345	1046.72	mut			N/A
307.5	1048.29	mut			N/A
70.278	1064.11	mut			N/A
300	1068	mut			N/A
394.633	1069.37	mut			N/A
161.471	1070.35	mut			N/A
380.75	1073.42	mut			N/A
196.176	1075.65	mut			N/A
259.057	1080.34	mut			N/A
223.548	1089.42	mut			N/A
350.935	1089.42	mut			N/A
276.865	1096.7	mut			N/A
172.5	1098.5	mut			N/A
440.5	1111.33	mut			N/A
203.633	1115.63	mut			N/A
255	1117.67	mut			N/A
320.125	1118.88	mut			N/A
408.286	1127.5	mut			N/A
317.048	1133.81	mut			N/A
275.282	1142.9	mut			N/A
236.296	1143.22	mut			N/A
213.667	1152.2	mut			N/A
279.129	1155.71	mut			N/A
282.5	1180.5	mut			N/A
215.5	667.5	mut			N/A
182.029	688.714	mut			N/A
142.867	699.8	mut			N/A
269.5	709	mut			N/A
163.091	720.697	mut			N/A
233.581	725.548	mut			N/A
305.594	729.438	mut			N/A
192.586	744.724	mut			N/A
203.926	760.593	mut			N/A
177.704	782.556	mut			N/A
216.5	785.5	mut			N/A
134.719	789.188	mut			N/A
237.679	790	mut			N/A
98	793.5	mut			N/A
160	796.656	mut			N/A
109.946	810.568	mut			N/A
180.433	816.167	mut			N/A
81.5	830	mut			N/A
156.853	835.382	mut			N/A
198.812	845	mut			N/A
182.838	871.459	mut			N/A
97.667	875.778	mut			N/A
145.757	876.243	mut			N/A
15.412	878.5	mut			N/A
204.407	882.444	mut			N/A
12.538	884.846	mut			N/A
165.909	894.364	mut			N/A
263.091	894.909	mut			N/A
107.267	918.2	mut			N/A
259.912	923.206	mut			N/A
362.259	924.593	mut			N/A
237.962	942.692	mut			N/A
154.586	945.276	mut			N/A
106	952.5	mut			N/A
360.613	953.677	mut			N/A
111.156	965.625	mut			N/A
317.912	970.971	mut			N/A
101.214	975.643	mut			N/A
265.571	992.771	mut			N/A
185.138	993.414	mut			N/A
57.276	994.414	mut			N/A
231	1000	mut			N/A
288.656	1001	mut			N/A
87.286	1012.52	mut			N/A
124.27	1013.68	mut			N/A
184.419	1020.74	mut			N/A
115.921	1029.05	mut			N/A
206	1043	mut			N/A
328.29	1046.71	mut			N/A
277.147	1052.62	mut			N/A
175.079	1054.95	mut			N/A
309.724	1059.59	mut			N/A
155.111	1062.5	mut			N/A
232.5	1064.17	mut			N/A
302.697	1067.91	mut			N/A
185.419	1068.55	mut			N/A
380	1070	mut			N/A
245.884	1089.12	mut			N/A
325.156	1088.62	mut			N/A
277.419	1093.55	mut			N/A
209.447	1096.05	mut			N/A
114.872	1098.72	mut			N/A
299.452	1103.58	mut			N/A
65.962	1106.81	mut			N/A
147.706	1110.5	mut			N/A
180.972	1116.08	mut			N/A
232.576	1118.97	mut			N/A
313.5	1122	mut			N/A
275.091	1138.7	mut			N/A
239.25	1140.06	mut			N/A
334.167	1139.5	mut			N/A
169.407	1142.44	mut			N/A
181.111	1148.81	mut			N/A
110.091	1152.09	mut			N/A
154	1159.29	mut			N/A
243	1163.4	mut			N/A
184.875	1166.67	mut			N/A
225.559	1167.18	mut			N/A
259.057	1166.89	mut			N/A
212.042	1181.46	mut			N/A
262.286	1204.57	mut			N/A
184.971	1207.15	mut			N/A
230.727	1213.18	mut			N/A
235.5	1231.79	mut			N/A
255.421	1232.11	mut			N/A
234.56	634.92	mut			N/A
260.176	640.176	mut			N/A
216.385	646.385	mut			N/A
203.111	670.444	mut			N/A
200.565	677.913	mut			N/A
274	679.174	mut			N/A
235	708.158	mut			N/A
174	728	mut			N/A
257.391	730.957	mut			N/A
199.548	763.581	mut			N/A
126.609	793.522	mut			N/A
229.08	793.56	mut			N/A
167.545	806.909	mut			N/A
134.92	811.8	mut			N/A
52.958	824.167	mut			N/A
339.091	823.909	mut			N/A
124.44	837.4	mut			N/A
152.424	837.424	mut			N/A
190.5	840.5	mut			N/A
143	839.5	mut			N/A
146.079	859.947	mut			N/A
251.818	859.591	mut			N/A
214.367	863.633	mut			N/A
291.71	863.29	mut			N/A
169.276	872.414	mut			N/A
119.367	893.467	mut			N/A
100.72	900.88	mut			N/A
177.214	901.5	mut			N/A
204.923	903.564	mut			N/A
33.2	915.92	mut			N/A
308.7	915.9	mut			N/A
199.448	919.586	mut			N/A
144.367	921.633	mut			N/A
174.892	934.135	mut			N/A
290.276	935.586	mut			N/A
124.842	938.789	mut			N/A
68.548	950.581	mut			N/A
108.771	952.429	mut			N/A
137	961	mut			N/A
200	968	mut			N/A
262.5	968.5	mut			N/A
175.091	973.091	mut			N/A
147.538	983.346	mut			N/A
228.368	988.474	mut			N/A
122.972	991.917	mut			N/A
76.5	992.5	mut			N/A
260.324	998.588	mut			N/A
306.5	1000.21	mut			N/A
163.156	1001.38	mut			N/A
10.826	1004.57	mut			N/A
114.757	1012.03	mut			N/A
199.235	1013.82	mut			N/A
82.194	1022.17	mut			N/A
58.259	1027.59	mut			N/A
13.346	1035.35	mut			N/A
146.389	1036.86	mut			N/A
196.73	1039.11	mut			N/A
74.455	1040.09	mut			N/A
164	1042.5	mut			N/A
110.135	1048.11	mut			N/A
124.586	1049.62	mut			N/A
46.524	1052	mut			N/A
94.13	1053.39	mut			N/A
71.393	1057.18	mut			N/A
175.865	1064.3	mut			N/A
122.588	1069.32	mut			N/A
257.114	1071.11	mut			N/A
48.531	1072.81	mut			N/A
73.727	1074.67	mut			N/A
133.414	1081.28	mut			N/A
107.389	1089.14	mut			N/A
188.086	1094.69	mut			N/A
164.088	1097.21	mut			N/A
12.158	1098.58	mut			N/A
186	1116.5	mut			N/A
61.633	1120.47	mut			N/A
91.2	1120.27	mut			N/A
161.167	1126.5	mut			N/A
255.276	1127.41	mut			N/A
128.306	1129.36	mut			N/A
46.706	1133.94	mut			N/A
19.609	1146.3	mut			N/A
65.875	1146	mut			N/A
131	1158.27	mut			N/A
187.385	1162.15	mut			N/A
78.097	1163.13	mut			N/A
111.97	1184.18	mut			N/A
124.5	1198.81	mut			N/A
161.296	1224	mut			N/A
127.462	1230.85	mut			N/A
227.769	1232.77	mut			N/A
183.889	1264.52	mut			N/A
159	1276.5	mut			N/A
209.844	1277.69	mut			N/A
206.048	1302.81	mut			N/A
104.889	835.722	mut			N/A
92.276	881.414	mut			N/A
73.919	903.541	mut			N/A
79.968	912.871	mut			N/A
110.29	912.71	mut			N/A
107.286	932	mut			N/A
88.028	938.083	mut			N/A
10.25	963.25	mut			N/A
75	962.647	mut			N/A
47.414	1040.62	mut			N/A
275.438	808.625	mut	213.974	628.181	0.776851
109.829	814.415	mut	85.3207	632.679	0.776851
180.711	825.089	mut	140.385	640.971	0.776851
144.133	832.644	mut	111.97	646.84	0.776851
93.5	844	mut	72.6355	655.662	0.776851
188.488	885.163	mut	146.427	687.639	0.776851
105.846	886.231	mut	82.2265	688.469	0.776851
144.571	886.122	mut	112.31	688.384	0.776851
11.875	891.875	mut	9.2251	692.854	0.776851
154.057	906.571	mut	119.679	704.27	0.776851
13.229	911.429	mut	10.277	708.044	0.776851
248.128	922.872	mut	192.758	716.934	0.776851
112.283	936.217	mut	87.2271	727.301	0.776851
82.158	936.789	mut	63.8245	727.745	0.776851
184.581	949.977	mut	143.392	737.99	0.776851
9.474	958.684	mut	7.35988	744.754	0.776851
119.571	974.673	mut	92.8888	757.175	0.776851
22.154	989.231	mut	17.2104	768.485	0.776851
112.556	1011.29	mut	87.4392	785.621	0.776851
33.714	1014.14	mut	26.1907	787.838	0.776851
199.114	1019.66	mut	154.682	792.121	0.776851
132.024	1022.59	mut	102.563	794.396	0.776851
46.167	1029.57	mut	35.8649	799.82	0.776851
139.636	1042.05	mut	108.476	809.513	0.776851
162.667	1067	mut	126.368	828.9	0.776851
178.5	1068.14	mut	138.668	829.788	0.776851
151.128	1088.87	mut	117.404	845.891	0.776851
155.676	705.588	mut	120.937	548.137	0.776851
175.714	710	mut	136.504	551.564	0.776851
192.121	731.939	mut	149.249	568.607	0.776851
160.532	734.319	mut	124.709	570.456	0.776851
225.2	753.075	mut	174.947	585.027	0.776851
153.17	762.979	mut	118.99	592.721	0.776851
109.238	772.143	mut	84.8616	599.84	0.776851
157.686	791.941	mut	122.498	615.22	0.776851
129.739	795.37	mut	100.788	617.884	0.776851
222.327	795.429	mut	172.715	617.93	0.776851
109.822	805.844	mut	85.3153	626.02	0.776851
129.929	813.19	mut	100.935	631.727	0.776851
97.471	850.431	mut	75.7204	660.658	0.776851
196.227	851.273	mut	152.439	661.312	0.776851
120.9	856.82	mut	93.9212	665.621	0.776851
287.886	859.886	mut	223.644	668.003	0.776851
8.079	869.368	mut	6.27618	675.369	0.776851
109.68	874.38	mut	85.205	679.263	0.776851
78.762	879.143	mut	61.1863	682.963	0.776851
211.191	893.638	mut	164.064	694.223	0.776851
105.381	896.095	mut	81.8653	696.132	0.776851
139.8	896.075	mut	108.604	696.116	0.776851
91.2	897.5	mut	70.8488	697.224	0.776851
172.333	922	mut	133.877	716.256	0.776851
333	928.588	mut	258.691	721.374	0.776851
290.818	932.455	mut	225.922	724.378	0.776851
196.356	937.667	mut	152.539	728.427	0.776851
105.694	938.714	mut	82.1085	729.241	0.776851
132	939.756	mut	102.544	730.05	0.776851
98.523	962.091	mut	76.5377	747.401	0.776851
236.103	967.641	mut	183.417	751.713	0.776851
9.935	977.581	mut	7.71801	759.434	0.776851
264.367	982.633	mut	205.374	763.359	0.776851
298.706	982.5	mut	232.05	763.256	0.776851
180.596	984.383	mut	140.296	764.719	0.776851
327.889	983.333	mut	254.721	763.903	0.776851
132.64	989.28	mut	103.041	768.523	0.776851
163.725	996.725	mut	127.19	774.307	0.776851
134	1011.24	mut	104.098	785.586	0.776851
384.111	1014.33	mut	298.397	787.985	0.776851
274	1018.33	mut	212.857	791.093	0.776851
226.844	1019.96	mut	176.224	792.354	0.776851
283.075	1030.8	mut	219.907	800.778	0.776851
155	1038	mut	120.412	806.371	0.776851
53.2	1045.92	mut	41.3285	812.528	0.776851
177	1050.67	mut	137.503	816.211	0.776851
230.647	1050.18	mut	179.178	815.831	0.776851
263.018	1061.58	mut	204.326	824.688	0.776851
155.378	1065.76	mut	120.706	827.934	0.776851
63.5	1067.13	mut	49.33	829.003	0.776851
182.432	1067.76	mut	141.722	829.488	0.776851
291.057	1068.85	mut	226.108	830.336	0.776851
204.05	1098.83	mut	158.516	853.623	0.776851
262.925	1123.95	mut	204.253	873.141	0.776851
225.884	1128.88	mut	175.478	876.974	0.776851
104.921	669.053	mut	81.508	519.754	0.776851
294.833	712.444	mut	229.041	553.463	0.776851
130.444	718.933	mut	101.336	558.504	0.776851
154.317	786.683	mut	119.881	611.135	0.776851
190.865	803.297	mut	148.274	624.042	0.776851
76.071	804.81	mut	59.0958	625.217	0.776851
109.955	806.636	mut	85.4186	626.636	0.776851
143.17	862.021	mut	111.222	669.662	0.776851
108.919	880.541	mut	84.6138	684.049	0.776851
9.081	885.378	mut	7.05458	687.807	0.776851
155.128	916.872	mut	120.511	712.273	0.776851
228.558	919.279	mut	177.555	714.143	0.776851
94.814	928.837	mut	73.6563	721.568	0.776851
124.326	929.163	mut	96.5827	721.821	0.776851
258.696	962.348	mut	200.968	747.601	0.776851
287.619	974.095	mut	223.437	756.726	0.776851
123.045	986.068	mut	95.5876	766.028	0.776851
233.8	992.925	mut	181.628	771.354	0.776851
139.646	1011.65	mut	108.484	785.898	0.776851
306.075	1011.8	mut	237.775	786.018	0.776851
221	1014	mut	171.684	787.727	0.776851
50.769	1021.15	mut	39.4399	793.284	0.776851
202.714	1020	mut	157.479	792.388	0.776851
177.273	1060.36	mut	137.715	823.745	0.776851
295.239	1064.07	mut	229.357	826.62	0.776851
432	1075.5	mut	335.6	835.503	0.776851
143.721	1077.93	mut	111.65	837.391	0.776851
184.175	1084.7	mut	143.076	842.65	0.776851
370.125	1086.12	mut	287.532	843.757	0.776851
208	1105.76	mut	161.585	859.007	0.776851
237.63	1106.11	mut	184.603	859.282	0.776851
238.075	1148.8	mut	184.949	892.446	0.776851
242	281.5	mut	187.998	218.683	0.776851
286	290.41	mut	222.179	225.605	0.776851
216.976	305.415	mut	168.558	237.262	0.776851
197.884	321.977	mut	153.726	250.128	0.776851
302.756	327	mut	235.196	254.03	0.776851
152.576	338.424	mut	118.529	262.905	0.776851
247.854	346.732	mut	192.546	269.359	0.776851
210.86	358.744	mut	163.807	278.691	0.776851
358.652	373.022	mut	278.619	289.782	0.776851
176.25	374.35	mut	136.92	290.814	0.776851
193.766	396.766	mut	150.527	308.228	0.776851
361.139	404.528	mut	280.551	314.258	0.776851
172.939	405.485	mut	134.348	315.001	0.776851
147.634	413.293	mut	114.69	321.067	0.776851
469.051	423.641	mut	364.383	329.106	0.776851
289.635	429.846	mut	225.003	333.926	0.776851
185.574	432.17	mut	144.163	335.732	0.776851
399.375	439.417	mut	310.255	341.361	0.776851
309.711	458.133	mut	240.599	355.901	0.776851
242	469.86	mut	187.998	365.011	0.776851
272.604	509.396	mut	211.773	395.725	0.776851
2	516.714	mut	1.5537	401.41	0.776851
408.095	523.262	mut	317.029	406.496	0.776851
144.047	534.163	mut	111.903	414.965	0.776851
421	536.32	mut	327.054	416.641	0.776851
344.021	542.17	mut	267.253	421.185	0.776851
501	545	mut	389.202	423.384	0.776851
452.116	561.558	mut	351.227	436.247	0.776851
376.684	573.184	mut	292.627	445.278	0.776851
83.861	579.611	mut	65.1475	450.271	0.776851
140.577	579.077	mut	109.207	449.856	0.776851
344.675	585.025	mut	267.761	454.477	0.776851
313.872	586.872	mut	243.832	455.912	0.776851
440.957	596.681	mut	342.558	463.532	0.776851
463.8	598.075	mut	360.303	464.615	0.776851
387.64	606.5	mut	301.138	471.16	0.776851
255.22	613.146	mut	198.268	476.323	0.776851
150.757	622.243	mut	117.116	483.39	0.776851
386.167	627.167	mut	299.994	487.215	0.776851
153.902	636.732	mut	119.559	494.646	0.776851
346.718	640.949	mut	269.348	497.922	0.776851
367.25	648	mut	285.298	503.399	0.776851
516.136	648.227	mut	400.961	503.576	0.776851
282.128	649.872	mut	219.171	504.854	0.776851
242.795	650.886	mut	188.615	505.641	0.776851
430.306	657.939	mut	334.284	511.12	0.776851
329.098	663.268	mut	255.66	515.26	0.776851
235.244	668	mut	182.749	518.936	0.776851
296.897	668.718	mut	230.645	519.494	0.776851
357.543	676.826	mut	277.758	525.793	0.776851
253.54	682.6	mut	196.963	530.278	0.776851
329.167	697.604	mut	255.714	541.934	0.776851
289.909	702.364	mut	225.216	545.632	0.776851
205.956	710.844	mut	159.997	552.22	0.776851
373.319	719.957	mut	290.013	559.299	0.776851
263.205	724.114	mut	204.471	562.528	0.776851
187.424	740.576	mut	145.6	575.317	0.776851
313.184	751.316	mut	243.297	583.66	0.776851
334.925	770.05	mut	260.187	598.214	0.776851
269.444	773.067	mut	209.318	600.558	0.776851
395	794.244	mut	306.856	617.009	0.776851
300.079	802.053	mut	233.117	623.075	0.776851
321.844	815.625	mut	250.025	633.619	0.776851
218.919	829.541	mut	170.067	644.43	0.776851
609.935	837.581	mut	473.828	650.675	0.776851
324.104	850.479	mut	251.78	660.695	0.776851
397.38	853.9	mut	308.705	663.353	0.776851
292.957	858.935	mut	227.584	667.264	0.776851
364.5	867.5	mut	283.162	673.918	0.776851
477.415	868.811	mut	370.88	674.936	0.776851
468.692	873	mut	364.104	678.191	0.776851
404.558	878.791	mut	314.281	682.689	0.776851
486.308	879.231	mut	377.789	683.031	0.776851
333.045	886.364	mut	258.726	688.572	0.776851
307.581	893.023	mut	238.945	693.746	0.776851
339.619	913.905	mut	263.833	709.968	0.776851
391.405	915.568	mut	304.063	711.26	0.776851
157.5	919.786	mut	122.354	714.536	0.776851
511.529	927.147	mut	397.382	720.255	0.776851
315.707	929.073	mut	245.257	721.751	0.776851
410	938	mut	318.509	728.686	0.776851
383.676	941.324	mut	298.059	731.268	0.776851
272.025	943.675	mut	211.323	733.095	0.776851
355.028	949.083	mut	275.804	737.296	0.776851
572.903	953.677	mut	445.06	740.865	0.776851
205.667	956.5	mut	159.773	743.058	0.776851
226.133	973.7	mut	175.672	756.42	0.776851
385.237	975.026	mut	299.272	757.45	0.776851
417.771	975.571	mut	324.546	757.873	0.776851
241.217	988.913	mut	187.39	768.238	0.776851
340.905	990.643	mut	264.832	769.582	0.776851
426.226	994.806	mut	331.114	772.816	0.776851
164.938	1009.22	mut	128.132	784.012	0.776851
322.978	1016.69	mut	250.906	789.816	0.776851
393.878	1023.98	mut	305.984	795.476	0.776851
303.459	1042.92	mut	235.742	810.192	0.776851
191.424	1043.58	mut	148.708	810.703	0.776851
334.056	1044.25	mut	259.512	811.226	0.776851
189.971	1055.62	mut	147.579	820.058	0.776851
355.659	1066.75	mut	276.294	828.705	0.776851
464.419	1071.02	mut	360.784	832.025	0.776851
141.103	1072.48	mut	109.616	833.159	0.776851
176	1072.76	mut	136.726	833.371	0.776851
222.256	1083.26	mut	172.66	841.528	0.776851
189.931	1085.62	mut	147.548	843.365	0.776851
382.569	1100.53	mut	297.199	854.947	0.776851
325.929	1106.95	mut	253.198	859.936	0.776851
297.681	1114.57	mut	231.254	865.858	0.776851
204.513	1118.46	mut	158.876	868.878	0.776851
520.571	1123.23	mut	404.406	872.581	0.776851
145.914	1132.69	mut	113.353	879.928	0.776851
319.178	1133.49	mut	247.954	880.552	0.776851
444.643	1133.14	mut	345.421	880.283	0.776851
343.415	1138.98	mut	266.782	884.814	0.776851
158.159	1140.75	mut	122.866	886.192	0.776851
539	1138.5	mut	418.723	884.445	0.776851
437.375	1140.19	mut	339.775	885.756	0.776851
118.771	1149.43	mut	92.2673	892.935	0.776851
244	1152.24	mut	189.552	895.122	0.776851
440.5	1152.5	mut	342.203	895.32	0.776851
191.3	1153.73	mut	148.612	896.278	0.776851
320.783	1157.96	mut	249.2	899.56	0.776851
539	1160.41	mut	418.723	901.465	0.776851
180.756	1171	mut	140.42	909.692	0.776851
341.419	1171.02	mut	265.232	909.71	0.776851
242.419	1185.02	mut	188.323	920.586	0.776851
145.5	1200.86	mut	113.032	932.887	0.776851
313.935	1209.07	mut	243.881	939.263	0.776851
253.51	1211.53	mut	196.939	941.179	0.776851
186.098	1217.27	mut	144.57	945.635	0.776851
129.853	1226.62	mut	100.876	952.899	0.776851
273.167	1227.95	mut	212.21	953.935	0.776851
299.385	1230.62	mut	232.577	956.004	0.776851
451	1239.83	mut	350.36	963.165	0.776851
152.756	1249	mut	118.669	970.287	0.776851
278.978	1250.2	mut	216.724	971.216	0.776851
204.59	1254.85	mut	158.936	974.828	0.776851
356.244	1262	mut	276.748	980.386	0.776851
135.842	1263.61	mut	105.529	981.632	0.776851
277.5	1264.5	mut	215.576	982.328	0.776851
452.625	1269.97	mut	351.622	986.576	0.776851
432.529	1272.66	mut	336.01	988.668	0.776851
172.462	1277.08	mut	133.977	992.098	0.776851
189.5	1288	mut	147.213	1000.58	0.776851
225.385	1286.92	mut	175.09	999.747	0.776851
284.452	1296.95	mut	220.977	1007.54	0.776851
154.872	1299.13	mut	120.312	1009.23	0.776851
339.925	1307.2	mut	264.071	1015.5	0.776851
178.857	1315.36	mut	138.945	1021.84	0.776851
346.138	1324.59	mut	268.898	1029.01	0.776851
225.818	1329	mut	175.427	1032.43	0.776851
152.2	1330.08	mut	118.237	1033.27	0.776851
163	1339	mut	126.627	1040.2	0.776851
278.784	1342.68	mut	216.574	1043.06	0.776851
227.382	1354.85	mut	176.642	1052.52	0.776851
240.2	1366.8	mut	186.6	1061.8	0.776851
204.075	1369.8	mut	158.536	1064.13	0.776851
220.952	1376.5	mut	171.647	1069.33	0.776851
350.703	1398.13	mut	272.444	1086.14	0.776851
205.533	1400.69	mut	159.668	1088.13	0.776851
155	1408.24	mut	120.412	1094	0.776851
138.091	1427.7	mut	107.276	1109.11	0.776851
179.205	1442.5	mut	139.216	1120.61	0.776851
227.719	1442.19	mut	176.904	1120.36	0.776851
248.516	1490.97	mut	193.06	1158.26	0.776851
60	839	mut	46.611	651.778	0.776851
52.725	894.49	mut	40.9595	694.885	0.776851
77.128	938.974	mut	59.9169	729.443	0.776851
125.423	987.615	mut	97.4349	767.229	0.776851
180.2	380.075	mut	139.988	295.262	0.776851
141.025	381.675	mut	109.555	296.504	0.776851
174.975	406.675	mut	135.929	315.926	0.776851
132.846	408.885	mut	103.202	317.643	0.776851
145.605	422.837	mut	113.113	328.481	0.776851
132.757	439.757	mut	103.132	341.626	0.776851
112.7	446.825	mut	87.5511	347.116	0.776851
90.321	461.643	mut	70.1659	358.628	0.776851
177	480.41	mut	137.503	373.207	0.776851
203.83	490.979	mut	158.345	381.417	0.776851
160.595	505.162	mut	124.758	392.435	0.776851
120.244	508.444	mut	93.4116	394.985	0.776851
148.816	557.837	mut	115.608	433.356	0.776851
205.81	557.929	mut	159.884	433.428	0.776851
362.611	566.139	mut	281.695	439.805	0.776851
146.059	565.824	mut	113.466	439.561	0.776851
257.821	584.692	mut	200.288	454.218	0.776851
211.116	592.884	mut	164.006	460.582	0.776851
337.829	605	mut	262.443	469.995	0.776851
176.289	611.911	mut	136.95	475.363	0.776851
379.4	615.933	mut	294.737	478.488	0.776851
153.071	622.81	mut	118.913	483.83	0.776851
364.75	629.375	mut	283.356	488.93	0.776851
243.116	638.884	mut	188.865	496.317	0.776851
128.927	650.537	mut	100.157	505.37	0.776851
222.516	666.065	mut	172.862	517.433	0.776851
335.5	671.5	mut	260.633	521.655	0.776851
373.054	705.568	mut	289.807	548.121	0.776851
210.41	707	mut	163.457	549.233	0.776851
334.756	707	mut	260.055	549.233	0.776851
139.2	723.2	mut	108.138	561.818	0.776851
329.758	734.242	mut	256.173	570.396	0.776851
171.953	736.302	mut	133.582	571.997	0.776851
237.167	745.667	mut	184.243	579.272	0.776851
218.923	751.564	mut	170.07	583.853	0.776851
264.081	753.459	mut	205.152	585.325	0.776851
184.146	761.562	mut	143.054	591.62	0.776851
359.895	765.211	mut	279.585	594.455	0.776851
193.343	789.943	mut	150.199	613.668	0.776851
198.077	814.564	mut	153.876	632.795	0.776851
357.053	822.658	mut	277.377	639.082	0.776851
431.647	829.529	mut	335.325	644.42	0.776851
379.429	840.229	mut	294.76	652.732	0.776851
296.071	849.071	mut	230.003	659.601	0.776851
230.625	851.95	mut	179.161	661.838	0.776851
366.69	868.172	mut	284.863	674.44	0.776851
249.333	872.644	mut	193.695	677.914	0.776851
341.054	888.432	mut	264.948	690.179	0.776851
316.182	893	mut	245.626	693.728	0.776851
279.738	902.31	mut	217.315	700.96	0.776851
330.6	927.371	mut	256.827	720.429	0.776851
245.788	928.455	mut	190.941	721.271	0.776851
430.8	937.333	mut	334.667	728.168	0.776851
416.853	954.471	mut	323.833	741.481	0.776851
251.115	962.308	mut	195.079	747.57	0.776851
323.576	971.576	mut	251.37	754.769	0.776851
292.533	971.867	mut	227.254	754.996	0.776851
296.8	979	mut	230.569	760.537	0.776851
400.5	979	mut	311.129	760.537	0.776851
351.59	984.18	mut	273.133	764.561	0.776851
369.2	996.833	mut	286.813	774.39	0.776851
308.526	1006.24	mut	239.679	781.696	0.776851
406.5	1006	mut	315.79	781.512	0.776851
249.541	1007.08	mut	193.856	782.352	0.776851
339.568	1016.61	mut	263.794	789.757	0.776851
397.419	1024.45	mut	308.735	795.846	0.776851
240.294	1025.5	mut	186.673	796.66	0.776851
428.581	1034.55	mut	332.943	803.689	0.776851
273.705	1037.25	mut	212.628	805.788	0.776851
370.333	1037.11	mut	287.693	805.68	0.776851
377.733	1050.17	mut	293.442	815.823	0.776851
198.333	1075.42	mut	154.075	835.438	0.776851
196.588	1138.15	mut	152.72	884.17	0.776851
241.675	1142.03	mut	187.745	887.183	0.776851
402	1146.56	mut	312.294	890.703	0.776851
326.576	1146.58	mut	253.701	890.718	0.776851
262.822	1157.07	mut	204.173	898.868	0.776851
294.872	1159.13	mut	229.072	900.469	0.776851
211.289	1196.09	mut	164.14	929.183	0.776851
388.909	1199.95	mut	302.124	932.186	0.776851
332.842	1214.79	mut	258.569	943.71	0.776851
193.588	1216.32	mut	150.389	944.901	0.776851
208.5	1221	mut	161.973	948.535	0.776851
280.286	1231.57	mut	217.74	956.747	0.776851
305.919	1246.54	mut	237.653	968.376	0.776851
391.806	1251.16	mut	304.375	971.965	0.776851
262.5	1257	mut	203.923	976.501	0.776851
443.889	1271.89	mut	344.835	988.068	0.776851
208	1273.9	mut	161.585	989.632	0.776851
302.217	1285.28	mut	234.777	998.473	0.776851
407.6	1287.34	mut	316.644	1000.07	0.776851
358.5	1303.5	mut	278.501	1012.62	0.776851
196.167	1305.5	mut	152.392	1014.18	0.776851
293.044	1331.93	mut	227.651	1034.71	0.776851
360.591	1346.77	mut	280.125	1046.24	0.776851
204.5	1349	mut	158.866	1047.97	0.776851
272.5	1356	mut	211.692	1053.41	0.776851
274.41	1390.59	mut	213.176	1080.28	0.776851
233.5	1394.5	mut	181.395	1083.32	0.776851
221.833	1407.83	mut	172.331	1093.68	0.776851
332.081	1417.54	mut	257.977	1101.22	0.776851
299.564	1423.26	mut	232.717	1105.66	0.776851
250.967	1427.27	mut	194.964	1108.77	0.776851
347.229	1435.57	mut	269.745	1115.22	0.776851
18.1	827.033	mut	14.061	642.481	0.776851
5.205	895.273	mut	4.04351	695.493	0.776851
137.769	710.282	mut	107.026	551.783	0.776851
228.75	716.417	mut	177.705	556.549	0.776851
216	736.5	mut	167.8	572.151	0.776851
230.714	753	mut	179.23	584.969	0.776851
60	777	mut	46.611	603.613	0.776851
175.56	789.88	mut	136.384	613.619	0.776851
282.95	801.825	mut	219.81	622.898	0.776851
75	819.8	mut	58.2638	636.862	0.776851
143.5	819.5	mut	111.478	636.629	0.776851
224.542	844.604	mut	174.436	656.131	0.776851
112.684	847.684	mut	87.5386	658.524	0.776851
20.5	851	mut	15.9254	661.1	0.776851
157.194	854.968	mut	122.116	664.182	0.776851
201.206	863.176	mut	156.307	670.559	0.776851
130.788	871.273	mut	101.603	676.849	0.776851
366.128	873.128	mut	284.427	678.29	0.776851
340.3	880.3	mut	264.362	683.862	0.776851
123.681	899.426	mut	96.0817	698.72	0.776851
197.471	912.431	mut	153.405	708.823	0.776851
298.778	937.5	mut	232.106	728.298	0.776851
239.393	959.214	mut	185.973	745.166	0.776851
126.044	975.956	mut	97.9174	758.172	0.776851
262.59	994	mut	203.993	772.19	0.776851
289.929	1009.86	mut	225.232	784.508	0.776851
203.135	1014.49	mut	157.806	788.105	0.776851
138.771	1047.43	mut	107.804	813.696	0.776851
120	1061.24	mut	93.2221	824.428	0.776851
163.091	1067.86	mut	126.697	829.571	0.776851
150.773	1074.64	mut	117.128	834.832	0.776851
249.636	1078.91	mut	193.93	838.151	0.776851
203	1085.76	mut	157.701	843.47	0.776851
169.971	1087.8	mut	132.042	845.058	0.776851
181.19	1109.93	mut	140.758	862.249	0.776851
128.25	1124.33	mut	99.6311	873.439	0.776851
208.195	555.707	mut	161.736	431.701	0.776851
141.128	561.872	mut	109.635	436.491	0.776851
141.5	590	mut	109.924	458.342	0.776851
183.327	604.429	mut	142.418	469.551	0.776851
288.327	607.429	mut	223.987	471.882	0.776851
318.5	615	mut	247.427	477.763	0.776851
126	616.902	mut	97.8832	479.241	0.776851
211.045	627.932	mut	163.95	487.809	0.776851
153.909	647.636	mut	119.564	503.116	0.776851
243.686	651.784	mut	189.308	506.339	0.776851
117.769	653.256	mut	91.4889	507.482	0.776851
278.955	662.932	mut	216.706	514.999	0.776851
125.667	670.222	mut	97.6245	520.662	0.776851
159.81	679.476	mut	124.149	527.851	0.776851
373.8	680.154	mut	290.387	528.378	0.776851
188.327	691.082	mut	146.302	536.868	0.776851
409	697.739	mut	317.732	542.039	0.776851
319.095	700.762	mut	247.889	544.387	0.776851
267.721	705.07	mut	207.979	547.734	0.776851
145.367	708.469	mut	112.928	550.375	0.776851
309.297	721.73	mut	240.278	560.676	0.776851
271.133	736.711	mut	210.63	572.314	0.776851
133.824	741.216	mut	103.961	575.814	0.776851
202.426	742.17	mut	157.255	576.555	0.776851
329.378	748.378	mut	255.878	581.378	0.776851
262	754	mut	203.535	585.745	0.776851
133.977	759.114	mut	104.08	589.718	0.776851
112.205	764.114	mut	87.1665	593.602	0.776851
296.396	765.396	mut	230.255	594.598	0.776851
129.209	784.233	mut	100.376	609.232	0.776851
189.8	801.075	mut	147.446	622.316	0.776851
257.296	805.63	mut	199.881	625.854	0.776851
195.5	825.5	mut	151.874	641.29	0.776851
277	828.5	mut	215.188	643.621	0.776851
158.325	829.025	mut	122.995	644.029	0.776851
123.886	837.795	mut	96.2409	650.842	0.776851
170.487	841.718	mut	132.443	653.889	0.776851
144	843.14	mut	111.867	654.994	0.776851
229.5	864.208	mut	178.287	671.361	0.776851
187.783	865.283	mut	145.879	672.196	0.776851
107.865	871.324	mut	83.795	676.889	0.776851
423.429	871.771	mut	328.941	677.236	0.776851
294.326	875.163	mut	228.647	679.871	0.776851
391.485	875.394	mut	304.125	680.05	0.776851
316.842	879.789	mut	246.139	683.465	0.776851
241.523	884.091	mut	187.627	686.807	0.776851
188.2	900.075	mut	146.203	699.224	0.776851
216.217	903.043	mut	167.968	701.53	0.776851
146.5	904.158	mut	113.809	702.396	0.776851
305.205	914.114	mut	237.099	710.13	0.776851
201.071	918.19	mut	156.202	713.297	0.776851
328.706	921.5	mut	255.355	715.868	0.776851
398.51	924.714	mut	309.583	718.365	0.776851
296.979	935.375	mut	230.708	726.647	0.776851
176.652	940.804	mut	137.232	730.864	0.776851
451.378	941.757	mut	350.653	731.605	0.776851
212.609	949.739	mut	165.165	737.805	0.776851
259	950.333	mut	201.204	738.267	0.776851
427.538	953.333	mut	332.133	740.597	0.776851
224.975	957.325	mut	174.772	743.699	0.776851
355.634	958.073	mut	276.275	744.28	0.776851
258.224	967.551	mut	200.601	751.643	0.776851
174.872	968.872	mut	135.849	752.669	0.776851
365.667	976.5	mut	284.069	758.595	0.776851
199.63	982.891	mut	155.083	763.56	0.776851
292.391	985.457	mut	227.144	765.553	0.776851
244.541	991.081	mut	189.972	769.922	0.776851
338.356	991.2	mut	262.852	770.014	0.776851
263.895	994.211	mut	205.007	772.354	0.776851
415.816	996.316	mut	323.027	773.989	0.776851
383.475	999.075	mut	297.903	776.132	0.776851
218.2	1007.92	mut	169.509	783.007	0.776851
287.27	1011.32	mut	223.166	785.648	0.776851
256.395	1013.87	mut	199.181	787.624	0.776851
328.458	1019.83	mut	255.163	792.258	0.776851
370.667	1023.22	mut	287.953	794.891	0.776851
445	1029.73	mut	345.699	799.95	0.776851
205.825	1031.78	mut	159.895	801.535	0.776851
347.981	1035.51	mut	270.329	804.436	0.776851
233.548	1037.71	mut	181.432	806.146	0.776851
245.646	1042.35	mut	190.83	809.753	0.776851
396.902	1051.78	mut	308.334	817.077	0.776851
355.217	1063.02	mut	275.951	825.806	0.776851
224.917	1073.02	mut	174.727	833.577	0.776851
281.854	1079.81	mut	218.958	838.853	0.776851
343.107	1083.43	mut	266.543	841.663	0.776851
288.947	1132.08	mut	224.469	879.456	0.776851
349.9	1141.55	mut	271.82	886.814	0.776851
310.9	1150.92	mut	241.523	894.097	0.776851
382.837	1174.44	mut	297.407	912.366	0.776851
254.105	1177.39	mut	197.402	914.66	0.776851
391.8	1204.2	mut	304.37	935.484	0.776851
454.925	1240.28	mut	353.409	963.509	0.776851
421.975	1266.33	mut	327.812	983.745	0.776851
344.923	1277.23	mut	267.954	992.218	0.776851
219.111	173.519	mut	113.478	325.898	0.5179
245.267	189.4	mut	127.024	334.123	0.5179
174.116	192.884	mut	90.1748	335.928	0.5179
205	200.837	mut	106.17	340.047	0.5179
273	206	mut	141.387	342.72	0.5179
171.5	239.36	mut	88.8199	359.998	0.5179
238.13	243.532	mut	123.328	362.158	0.5179
120.7	249.933	mut	62.5106	365.473	0.5179
162.636	263.909	mut	84.2293	372.712	0.5179
67.944	311.917	mut	35.1882	397.575	0.5179
443	334.2	mut	229.43	409.115	0.5179
117.255	355.436	mut	60.7264	420.113	0.5179
172.078	366.859	mut	89.1193	426.029	0.5179
182.784	386.451	mut	94.6639	436.176	0.5179
211	406	mut	109.277	446.301	0.5179
64.385	407.577	mut	33.345	447.117	0.5179
155.5	408.5	mut	80.5335	447.595	0.5179
116.579	412.579	mut	60.3763	449.708	0.5179
479.75	413	mut	248.463	449.926	0.5179
104.348	429.304	mut	54.0419	458.37	0.5179
46.238	439.524	mut	23.9467	463.663	0.5179
214.59	439.821	mut	111.136	463.816	0.5179
149.723	448.831	mut	77.5416	468.483	0.5179
260.824	448.157	mut	135.081	468.134	0.5179
90.875	458	mut	47.0642	473.231	0.5179
122.195	469.039	mut	63.2849	478.948	0.5179
205.679	470	mut	106.521	479.446	0.5179
264.932	476.045	mut	137.208	482.577	0.5179
129.415	480.171	mut	67.0241	484.714	0.5179
376.083	478.833	mut	194.774	484.021	0.5179
255.918	506.51	mut	132.54	498.355	0.5179
99.025	511.025	mut	51.2851	500.693	0.5179
302.404	512.064	mut	156.615	501.231	0.5179
142.422	515.8	mut	73.7604	503.166	0.5179
203.872	521.872	mut	105.585	506.311	0.5179
43.35	529.55	mut	22.451	510.287	0.5179
107.938	537.188	mut	55.9011	514.243	0.5179
120.31	551.897	mut	62.3086	521.861	0.5179
304.185	553.593	mut	157.538	522.739	0.5179
237	555.708	mut	122.742	523.834	0.5179
344.067	558.556	mut	178.192	525.309	0.5179
101.019	567.741	mut	52.3178	530.066	0.5179
378.984	569.794	mut	196.276	531.13	0.5179
171.367	573.1	mut	88.7511	532.842	0.5179
269.837	574.674	mut	139.749	533.657	0.5179
488.468	584.064	mut	252.978	538.52	0.5179
525.846	594.462	mut	272.336	543.905	0.5179
275	605.292	mut	142.423	549.514	0.5179
111.174	611.478	mut	57.5771	552.718	0.5179
210.556	631.593	mut	109.047	563.135	0.5179
251.204	634.944	mut	130.099	564.871	0.5179
156.024	635.905	mut	80.8049	565.368	0.5179
298.926	638.593	mut	154.814	566.761	0.5179
162.346	643.692	mut	84.0791	569.401	0.5179
195.452	657.405	mut	101.225	576.503	0.5179
349.727	668.5	mut	181.124	582.249	0.5179
298	685.735	mut	154.334	591.175	0.5179
209.635	698.012	mut	108.57	597.534	0.5179
126.028	696.917	mut	65.27	596.967	0.5179
96.56	702.1	mut	50.0085	599.651	0.5179
177.892	706.297	mut	92.1304	601.824	0.5179
453.605	710.132	mut	234.922	603.811	0.5179
351.233	726.3	mut	181.904	612.184	0.5179
419.071	733.714	mut	217.037	616.024	0.5179
758.929	736.548	mut	393.05	617.492	0.5179
348.556	738.111	mut	180.517	618.301	0.5179
417.125	743.667	mut	216.029	621.178	0.5179
122.48	745.88	mut	63.4325	622.325	0.5179
169.875	746.375	mut	87.9783	622.581	0.5179
283.391	747.957	mut	146.768	623.4	0.5179
172.889	755.333	mut	89.5393	627.22	0.5179
283	756.167	mut	146.566	627.652	0.5179
350.794	761.794	mut	181.676	630.566	0.5179
497.7	761.7	mut	257.759	630.518	0.5179
103.667	764.267	mut	53.6892	631.847	0.5179
371.846	776.538	mut	192.579	638.202	0.5179
799.385	778.256	mut	414.002	639.092	0.5179
181.846	782.308	mut	94.1781	641.191	0.5179
286.615	794.385	mut	148.438	647.445	0.5179
390.69	810.448	mut	202.339	655.764	0.5179
237.429	819.343	mut	122.965	660.371	0.5179
499.429	819.714	mut	258.655	660.563	0.5179
448.543	827.114	mut	232.301	664.396	0.5179
349.091	833.909	mut	180.794	667.915	0.5179
164.897	840.828	mut	85.4002	671.498	0.5179
746.95	851.75	mut	386.846	677.155	0.5179
550.862	859.723	mut	285.292	681.284	0.5179
445	866.759	mut	230.466	684.928	0.5179
329.688	873.438	mut	170.746	688.387	0.5179
825.667	873.111	mut	427.613	688.218	0.5179
321.312	877.25	mut	166.408	690.361	0.5179
800.25	892.312	mut	414.45	698.162	0.5179
600.38	897.1	mut	310.937	700.641	0.5179
723.771	902.571	mut	374.841	703.475	0.5179
205.538	907.846	mut	106.448	706.207	0.5179
494.784	908.459	mut	256.249	706.524	0.5179
974.061	915.091	mut	504.467	709.959	0.5179
267.576	914.424	mut	138.578	709.614	0.5179
544.128	922.128	mut	281.804	713.603	0.5179
857.234	934.078	mut	443.962	719.792	0.5179
651.615	933.538	mut	337.472	719.513	0.5179
211.5	941	mut	109.536	723.377	0.5179
431.576	945.576	mut	223.513	725.747	0.5179
1058.07	971.742	mut	547.972	739.299	0.5179
486.105	973.789	mut	251.754	740.359	0.5179
1099.57	975.714	mut	569.468	741.356	0.5179
831.15	978.225	mut	430.453	742.656	0.5179
936.527	996.919	mut	485.028	752.338	0.5179
315.5	1007.5	mut	163.398	757.818	0.5179
411.293	1013.32	mut	213.009	760.83	0.5179
872.481	1015.71	mut	451.858	762.069	0.5179
1113.63	1015.52	mut	576.75	761.97	0.5179
355.905	1034.62	mut	184.323	771.863	0.5179
415	1047.5	mut	214.929	778.534	0.5179
1088.76	1048.81	mut	563.868	779.213	0.5179
463.361	1054	mut	239.975	781.9	0.5179
687.131	1055.73	mut	355.865	782.794	0.5179
702.889	1065.67	mut	364.027	787.942	0.5179
509.333	1095.72	mut	263.784	803.509	0.5179
769.455	1094.18	mut	398.501	802.71	0.5179
473.643	1100.3	mut	245.3	805.879	0.5179
411.026	1111.68	mut	212.871	811.775	0.5179
182.976	1113.46	mut	94.7634	812.696	0.5179
315.217	1116.09	mut	163.251	814.055	0.5179
269	1122.91	mut	139.315	817.587	0.5179
381.872	1133.95	mut	197.772	823.306	0.5179
602.909	1150.09	mut	312.247	831.666	0.5179
271.95	1153.55	mut	140.843	833.457	0.5179
551.397	1155.4	mut	285.569	834.414	0.5179
386.982	1158.36	mut	200.418	835.95	0.5179
522.258	1163.58	mut	270.478	838.652	0.5179
307.303	1165.91	mut	159.152	839.858	0.5179
418.368	1168.56	mut	216.673	841.231	0.5179
632.062	1172.31	mut	327.345	843.172	0.5179
119.139	1181.61	mut	61.7021	847.99	0.5179
102	1196.75	mut	52.8259	855.83	0.5179
539.218	1201.47	mut	279.261	858.276	0.5179
567.257	1206.7	mut	293.783	860.983	0.5179
248.172	1210.62	mut	128.528	863.014	0.5179
271.347	1217.35	mut	140.531	866.498	0.5179
126.414	1231.59	mut	65.4699	873.872	0.5179
176.111	1231.28	mut	91.208	873.712	0.5179
244.091	1255.02	mut	126.415	886.006	0.5179
289.758	1257.55	mut	150.066	887.316	0.5179
146.185	1258	mut	75.7093	887.552	0.5179
304	1263.02	mut	157.442	890.15	0.5179
80.411	1283.05	mut	41.6449	900.527	0.5179
335.955	1305.36	mut	173.991	912.082	0.5179
107.338	1309.77	mut	55.5904	914.363	0.5179
647.927	1309.17	mut	335.562	914.053	0.5179
161.234	1312.05	mut	83.5032	915.543	0.5179
173.741	1333.41	mut	89.9806	926.605	0.5179
52.226	1341.87	mut	27.0479	930.989	0.5179
141.358	1352.68	mut	73.2094	936.586	0.5179
49.939	1354.47	mut	25.8634	937.514	0.5179
184.389	1366.36	mut	95.4952	943.672	0.5179
638.457	1373.8	mut	330.657	947.525	0.5179
95.778	1379.5	mut	49.6035	950.477	0.5179
213.689	1382.7	mut	110.67	952.137	0.5179
420.667	1381.79	mut	217.864	951.661	0.5179
354.778	1390.71	mut	183.74	956.283	0.5179
621.264	1390.55	mut	321.753	956.198	0.5179
45.742	1395.98	mut	23.6898	959.014	0.5179
394.571	1398.88	mut	204.349	960.511	0.5179
87.528	1415.86	mut	45.3308	969.308	0.5179
377.636	1430.27	mut	195.578	976.772	0.5179
152.225	1433.3	mut	78.8374	978.34	0.5179
84.5	1448.37	mut	43.7626	986.145	0.5179
56.974	1447.9	mut	29.5069	985.9	0.5179
107.783	1449.67	mut	55.8209	986.82	0.5179
119.905	1483.74	mut	62.0989	1004.46	0.5179
313.944	1500.89	mut	162.592	1013.34	0.5179
63.138	1510.5	mut	32.6992	1018.32	0.5179
209.154	1510.38	mut	108.321	1018.26	0.5179
326.188	1518.62	mut	168.933	1022.53	0.5179
285.12	1536.52	mut	147.664	1031.8	0.5179
258.527	1551.78	mut	133.891	1039.7	0.5179
424.787	333.213	mut	219.997	408.604	0.5179
283.06	352.48	mut	146.597	418.582	0.5179
325	366.789	mut	168.318	425.993	0.5179
344.5	382.593	mut	178.417	434.178	0.5179
289.789	402.158	mut	150.082	444.311	0.5179
253.281	414.544	mut	131.174	450.725	0.5179
413.1	420.333	mut	213.945	453.724	0.5179
328.585	427.321	mut	170.174	457.343	0.5179
222.141	442.188	mut	115.047	465.042	0.5179
152.2	460.2	mut	78.8245	474.371	0.5179
267.91	461.254	mut	138.751	474.917	0.5179
301.689	479.973	mut	156.245	484.611	0.5179
112.714	481.143	mut	58.3746	485.217	0.5179
171.935	487.961	mut	89.0452	488.748	0.5179
380.05	492.95	mut	196.828	491.332	0.5179
215.353	494.686	mut	111.531	492.231	0.5179
280.157	502.071	mut	145.093	496.056	0.5179
208.167	513.667	mut	107.81	502.061	0.5179
152.244	522.537	mut	78.8472	506.655	0.5179
265.938	550.469	mut	137.729	521.121	0.5179
187.276	561.741	mut	96.9903	526.959	0.5179
99.75	562.25	mut	51.6606	527.222	0.5179
133.111	569.333	mut	68.9383	530.891	0.5179
214.117	578.417	mut	110.891	535.595	0.5179
140.585	584.805	mut	72.809	538.904	0.5179
90.952	594.81	mut	47.1041	544.085	0.5179
208.953	606.163	mut	108.217	549.965	0.5179
252.681	617.574	mut	130.864	555.875	0.5179
125.676	620.784	mut	65.0877	557.537	0.5179
179.146	625	mut	92.7798	559.721	0.5179
52.643	633.429	mut	27.2638	564.086	0.5179
338.378	635.867	mut	175.246	565.349	0.5179
235.431	637.448	mut	121.93	566.168	0.5179
128.818	643.182	mut	66.7149	569.137	0.5179
168.324	648.588	mut	87.1751	571.937	0.5179
89.407	652.074	mut	46.3039	573.742	0.5179
268.744	666.026	mut	139.183	580.968	0.5179
11.118	667.412	mut	5.75802	581.686	0.5179
162.698	679.651	mut	84.2614	588.025	0.5179
377.913	682.652	mut	195.721	589.579	0.5179
227.897	686.586	mut	118.028	591.616	0.5179
71.871	687.29	mut	37.222	591.981	0.5179
42.217	688.913	mut	21.8642	592.821	0.5179
140.014	700.333	mut	72.5133	598.736	0.5179
301	698.5	mut	155.888	597.786	0.5179
250.527	709.782	mut	129.748	603.629	0.5179
353	716	mut	182.819	606.85	0.5179
197.611	719.389	mut	102.343	608.605	0.5179
83.255	727.327	mut	43.1178	612.716	0.5179
278.938	731.37	mut	144.462	614.81	0.5179
80.545	747.898	mut	41.7143	623.37	0.5179
331	751.717	mut	171.425	625.348	0.5179
387.78	757.56	mut	200.831	628.374	0.5179
302.472	769.028	mut	156.65	634.313	0.5179
187.179	776.679	mut	96.9401	638.275	0.5179
87.255	781.979	mut	45.1894	641.02	0.5179
255.075	784.2	mut	132.103	642.17	0.5179
151.512	797.781	mut	78.4681	649.204	0.5179
323.964	821.607	mut	167.781	661.544	0.5179
257.48	826.32	mut	133.349	663.984	0.5179
79.058	834.275	mut	40.9442	668.104	0.5179
347.682	842.227	mut	180.065	672.223	0.5179
108.844	842.625	mut	56.3704	672.429	0.5179
214.775	852.55	mut	111.232	677.569	0.5179
251.256	857.219	mut	130.126	679.987	0.5179
149.258	877.225	mut	77.3008	690.348	0.5179
383.6	876.933	mut	198.667	690.197	0.5179
56.314	888.886	mut	29.165	696.387	0.5179
107	906.165	mut	55.4154	705.336	0.5179
301.54	916.84	mut	156.168	710.865	0.5179
55.123	917.474	mut	28.5482	711.193	0.5179
128.22	927.02	mut	66.4052	716.137	0.5179
234.228	928.526	mut	121.307	716.917	0.5179
176.6	937.6	mut	91.4612	721.616	0.5179
93.629	943.429	mut	48.4905	724.635	0.5179
292.276	946.563	mut	151.37	726.258	0.5179
138.085	960.441	mut	71.5143	733.446	0.5179
44.7	961.5	mut	23.1502	733.994	0.5179
182.088	961.206	mut	94.3035	733.842	0.5179
176.8	970	mut	91.5648	738.396	0.5179
243.535	975.57	mut	126.127	741.281	0.5179
439	978.5	mut	227.358	742.799	0.5179
237.875	1022.12	mut	123.196	765.392	0.5179
158.077	1025.54	mut	81.8682	767.16	0.5179
428.935	1031.71	mut	222.146	770.356	0.5179
82.831	1046.86	mut	42.8982	778.204	0.5179
117.958	1044.94	mut	61.0905	777.207	0.5179
340.764	1056.71	mut	176.482	783.303	0.5179
201.694	1056.5	mut	104.457	783.195	0.5179
282.03	1056.18	mut	146.063	783.03	0.5179
148.071	1066.93	mut	76.686	788.596	0.5179
78.581	1074.58	mut	40.6971	792.559	0.5179
323.407	1084.07	mut	167.493	797.475	0.5179
201.643	1097.71	mut	104.431	804.54	0.5179
137.381	1109.24	mut	71.1497	810.508	0.5179
262.929	1109.39	mut	136.171	810.588	0.5179
174.412	1115.12	mut	90.3281	813.553	0.5179
221.615	1124.18	mut	114.775	818.246	0.5179
323.913	1125	mut	167.755	818.671	0.5179
247.744	1127.08	mut	128.307	819.747	0.5179
269.81	1148.86	mut	139.735	831.027	0.5179
181.971	1151.11	mut	94.2429	832.195	0.5179
191.105	1155.58	mut	98.9734	834.508	0.5179
260.854	1167.1	mut	135.096	840.477	0.5179
119.103	1167.52	mut	61.6835	840.691	0.5179
154.258	1182.9	mut	79.8903	848.659	0.5179
305.091	1181.91	mut	158.007	848.144	0.5179
211.451	1188.63	mut	109.511	851.623	0.5179
341.593	1191.56	mut	176.911	853.14	0.5179
425.659	1200.75	mut	220.449	857.902	0.5179
180.867	1208.48	mut	93.6711	861.907	0.5179
132.346	1209.65	mut	68.5421	862.513	0.5179
307.259	1214.17	mut	159.13	864.853	0.5179
267.667	1221.74	mut	138.625	868.773	0.5179
397.774	1231.48	mut	206.007	873.819	0.5179
215.455	1233.44	mut	111.584	874.83	0.5179
125.725	1236.74	mut	65.113	876.544	0.5179
334.884	1246.12	mut	173.437	881.397	0.5179
164.333	1247.92	mut	85.1081	882.33	0.5179
211.931	1258.81	mut	109.759	887.971	0.5179
182.542	1273.27	mut	94.5386	895.461	0.5179
127.875	1274.69	mut	66.2265	896.194	0.5179
307.884	1275.88	mut	159.453	896.814	0.5179
376.523	1285.86	mut	195.001	901.983	0.5179
217.897	1292.48	mut	112.849	905.411	0.5179
182.192	1293.81	mut	94.3573	906.097	0.5179
248.533	1303.7	mut	128.715	911.22	0.5179
403.768	1307.07	mut	209.112	912.967	0.5179
342.481	1327.25	mut	177.371	923.416	0.5179
281.586	1359.4	mut	145.834	940.067	0.5179
311.062	1390.91	mut	161.099	956.384	0.5179
364.431	1405.47	mut	188.739	963.927	0.5179
165.304	738.609	mut	85.611	618.559	0.5179
125.704	800.222	mut	65.1022	650.468	0.5179
98.615	852.385	mut	51.0728	677.484	0.5179
171.423	882.846	mut	88.7801	693.259	0.5179
82.845	890.549	mut	42.9055	697.249	0.5179
125	907.513	mut	64.7376	706.034	0.5179
153.282	921.59	mut	79.3848	713.325	0.5179
170.614	948.735	mut	88.3611	727.383	0.5179
217.861	952.708	mut	112.83	729.441	0.5179
115.905	967.297	mut	60.0273	736.997	0.5179
271.578	972.234	mut	140.65	739.553	0.5179
78.661	993.153	mut	40.7386	750.387	0.5179
127.569	998.389	mut	66.068	753.099	0.5179
205.817	1019.37	mut	106.593	763.964	0.5179
101.167	1033.74	mut	52.3944	771.405	0.5179
103.302	1073.94	mut	53.5002	792.225	0.5179
296.587	655.588	mut	153.603	575.562	0.5179
412.786	672.214	mut	213.782	584.173	0.5179
322.929	710.843	mut	167.245	604.179	0.5179
411.375	721.25	mut	213.051	609.569	0.5179
269.859	736.014	mut	139.76	617.215	0.5179
193.1	759.944	mut	100.007	629.608	0.5179
255	756.5	mut	132.065	627.825	0.5179
375.049	771.443	mut	194.238	635.564	0.5179
300.642	779.63	mut	155.703	639.804	0.5179
366.864	787.864	mut	189.999	644.068	0.5179
215.8	811.506	mut	111.763	656.312	0.5179
134.296	817.457	mut	69.552	659.394	0.5179
290.051	833.356	mut	150.218	667.628	0.5179
236.282	844.471	mut	122.371	673.385	0.5179
192.94	846.518	mut	99.9237	674.445	0.5179
368.158	865.158	mut	190.669	684.099	0.5179
134.324	869	mut	69.5665	686.088	0.5179
313.884	875.58	mut	162.561	689.496	0.5179
182.237	885.645	mut	94.3806	694.709	0.5179
83.403	891.931	mut	43.1945	697.964	0.5179
386.365	902.81	mut	200.099	703.599	0.5179
97.745	911.137	mut	50.6222	707.911	0.5179
144.043	913.129	mut	74.5999	708.943	0.5179
251.479	922.562	mut	130.241	713.828	0.5179
148	921	mut	76.6493	713.019	0.5179
289.5	924.341	mut	149.932	714.75	0.5179
350.547	937.672	mut	181.548	721.654	0.5179
70.5	938	mut	36.512	721.824	0.5179
214.963	939.293	mut	111.329	722.493	0.5179
153.671	942.671	mut	79.5863	724.243	0.5179
58.1	959.9	mut	30.09	733.166	0.5179
145.068	966.475	mut	75.1308	736.571	0.5179
84.915	968.746	mut	43.9775	737.747	0.5179
56.286	966	mut	29.1505	736.325	0.5179
204.173	970.556	mut	105.741	738.684	0.5179
298.603	980.952	mut	154.647	744.068	0.5179
66.245	982.302	mut	34.3083	744.768	0.5179
383.562	982.625	mut	198.647	744.935	0.5179
186.423	988.603	mut	96.5486	748.031	0.5179
247.5	1006.76	mut	128.18	757.432	0.5179
145.667	1015.79	mut	75.441	762.113	0.5179
243.671	1032.29	mut	126.197	770.658	0.5179
89.385	1040.1	mut	46.2925	774.699	0.5179
423.033	1045.63	mut	219.089	777.567	0.5179
192.188	1061.34	mut	99.5343	785.7	0.5179
357.684	1070.98	mut	185.245	790.695	0.5179
216.605	1072.43	mut	112.18	791.447	0.5179
93.029	1092.94	mut	48.1798	802.068	0.5179
485.286	1103.29	mut	251.33	807.425	0.5179
181.714	1103.64	mut	94.1098	807.61	0.5179
135	1106.88	mut	69.9166	809.287	0.5179
301.014	1119.4	mut	155.895	815.769	0.5179
96.113	1137.9	mut	49.777	825.353	0.5179
222	1139	mut	114.974	825.922	0.5179
399.923	1156.5	mut	207.12	834.985	0.5179
195.206	1163.83	mut	101.097	838.778	0.5179
132	1169	mut	68.3629	841.459	0.5179
220.569	1185.52	mut	114.233	850.016	0.5179
154.816	1202.53	mut	80.1793	858.824	0.5179
206.286	1208.48	mut	106.836	861.903	0.5179
246.266	1232.38	mut	127.541	874.281	0.5179
178.593	680.926	mut	92.4934	588.685	0.5179
214.411	732.964	mut	111.044	615.635	0.5179
250.436	734.527	mut	129.701	616.445	0.5179
121.789	759.972	mut	63.0746	629.623	0.5179
278.207	763.69	mut	144.084	631.548	0.5179
184.5	781	mut	95.5526	640.513	0.5179
355.875	788.375	mut	184.308	644.333	0.5179
127.689	798	mut	66.1302	649.318	0.5179
169.014	823.014	mut	87.5324	662.272	0.5179
106.197	830.324	mut	54.9995	666.058	0.5179
273.013	854.55	mut	141.394	678.605	0.5179
347.389	871.389	mut	179.913	687.326	0.5179
121.852	872.463	mut	63.1072	687.882	0.5179
137.827	887.027	mut	71.3807	695.425	0.5179
128	932.574	mut	66.2913	719.013	0.5179
235.455	937.436	mut	121.942	721.531	0.5179
148.824	945.149	mut	77.076	725.526	0.5179
300.655	946.293	mut	155.709	726.119	0.5179
164.884	973.696	mut	85.3935	740.311	0.5179
84.943	991.043	mut	43.992	749.295	0.5179
123.153	995.475	mut	63.781	751.59	0.5179
153.092	1015.57	mut	79.2864	761.995	0.5179
87.431	1026.26	mut	45.2806	767.533	0.5179
189.139	1038.04	mut	97.9552	773.635	0.5179
233.114	1055.2	mut	120.73	782.524	0.5179
286.559	1057.56	mut	148.409	783.743	0.5179
119.391	1069.31	mut	61.8327	789.83	0.5179
177.795	1077.77	mut	92.0801	794.209	0.5179
153.492	1085.43	mut	79.4936	798.176	0.5179
144.158	1100.37	mut	74.6595	805.914	0.5179
259.6	1133.95	mut	134.447	823.308	0.5179
361.985	573.182	mut	187.472	532.884	0.5179
262.242	587.727	mut	135.815	540.417	0.5179
155.133	602.533	mut	80.3435	548.085	0.5179
238.875	663.953	mut	123.713	579.895	0.5179
271.941	702.029	mut	140.838	599.614	0.5179
360.058	748.615	mut	186.474	623.741	0.5179
242.468	796.948	mut	125.574	648.773	0.5179
323.092	820.434	mut	167.33	660.936	0.5179
352.812	820.101	mut	182.722	660.764	0.5179
239.562	831.479	mut	124.069	666.656	0.5179
346.092	870.934	mut	179.241	687.09	0.5179
158.194	876.278	mut	81.9288	689.858	0.5179
250.405	878.973	mut	129.685	691.253	0.5179
273.797	888.772	mut	141.8	696.328	0.5179
333.411	893.027	mut	172.674	698.532	0.5179
300.851	913.419	mut	155.811	709.093	0.5179
335.188	946.29	mut	173.594	726.117	0.5179
170.458	947.5	mut	88.2803	726.744	0.5179
295.351	953.182	mut	152.962	729.686	0.5179
353.111	962.206	mut	182.876	734.36	0.5179
149	968.884	mut	77.1672	737.818	0.5179
227.304	972.507	mut	117.721	739.695	0.5179
110.389	984.278	mut	57.1705	745.791	0.5179
203.929	989.157	mut	105.615	748.318	0.5179
172.118	992.526	mut	89.14	750.063	0.5179
434.818	993.773	mut	225.192	750.708	0.5179
340.961	1005.2	mut	176.584	756.625	0.5179
295.901	1026.9	mut	153.247	767.865	0.5179
152.806	1032.94	mut	79.1383	770.995	0.5179
216.057	1040.04	mut	111.896	774.672	0.5179
439.852	1053.9	mut	227.8	781.847	0.5179
190.534	1062.94	mut	98.6777	786.533	0.5179
443.864	1066.77	mut	229.877	788.515	0.5179
101.229	1083.23	mut	52.4265	797.038	0.5179
185.135	1102.3	mut	95.8815	806.913	0.5179
221.974	1110.44	mut	114.96	811.131	0.5179
273.958	1109.94	mut	141.883	810.873	0.5179
241.315	1156.62	mut	124.977	835.045	0.5179
352.13	1183.65	mut	182.368	849.047	0.5179
234.889	1211.33	mut	121.649	863.383	0.5179
350.557	1233.05	mut	181.554	874.63	0.5179
388.2	678.717	mut	201.049	587.541	0.5179
415.766	681.34	mut	215.325	588.899	0.5179
336.943	707.957	mut	174.503	602.684	0.5179
391.441	720.966	mut	202.727	609.422	0.5179
347.471	745.926	mut	179.955	622.348	0.5179
285.774	759.258	mut	148.002	629.253	0.5179
399.133	790.533	mut	206.711	645.45	0.5179
182.288	797.915	mut	94.407	649.274	0.5179
139.093	816.926	mut	72.0363	659.119	0.5179
156.279	839.475	mut	80.937	670.797	0.5179
255.724	841.816	mut	132.44	672.01	0.5179
310.837	864.98	mut	160.983	684.006	0.5179
122.516	871.016	mut	63.4511	687.133	0.5179
153.564	871.077	mut	79.5309	687.164	0.5179
138.947	875.5	mut	71.9607	689.455	0.5179
243.947	880.5	mut	126.34	692.044	0.5179
127.055	918.909	mut	65.8018	711.936	0.5179
199.808	954.342	mut	103.481	730.287	0.5179
106.095	960.762	mut	54.9467	733.612	0.5179
264.648	976.42	mut	137.061	741.721	0.5179
87.068	977.525	mut	45.0926	742.294	0.5179
227.438	976.75	mut	117.79	741.892	0.5179
235.871	1018.68	mut	122.158	763.606	0.5179
193.438	1022.99	mut	100.182	765.838	0.5179
137.167	1033.38	mut	71.0389	771.22	0.5179
143.012	1148.65	mut	74.066	830.918	0.5179
272.085	600.383	mut	140.913	546.972	0.5179
335.409	621.473	mut	173.708	557.894	0.5179
160.969	623.354	mut	83.3659	558.868	0.5179
99.816	623.526	mut	51.6948	558.957	0.5179
531.196	627.761	mut	275.107	561.151	0.5179
355.688	634.188	mut	184.211	564.479	0.5179
235.91	638.254	mut	122.178	566.585	0.5179
170.068	655.955	mut	88.0783	575.752	0.5179
205.615	668.108	mut	106.488	582.046	0.5179
366	671.671	mut	189.552	583.892	0.5179
129.877	686.2	mut	67.2634	591.416	0.5179
214.061	688.505	mut	110.862	592.61	0.5179
259.281	690.188	mut	134.282	593.482	0.5179
175.743	698.892	mut	91.0174	597.989	0.5179
127.304	725.196	mut	65.9308	611.612	0.5179
163.779	734.766	mut	84.8212	616.569	0.5179
112.5	759.5	mut	58.2638	629.378	0.5179
254.724	765.263	mut	131.922	632.363	0.5179
211	781.8	mut	109.277	640.928	0.5179
319.212	798.425	mut	165.32	649.538	0.5179
204.558	824.896	mut	105.941	663.247	0.5179
257.494	827.099	mut	133.356	664.388	0.5179
407.16	832.707	mut	210.868	667.292	0.5179
177.661	853.468	mut	92.0107	678.044	0.5179
264.266	868.747	mut	136.863	685.957	0.5179
137.162	886.081	mut	71.0363	694.935	0.5179
324.702	896.358	mut	168.163	700.257	0.5179
448.395	896.642	mut	232.224	700.404	0.5179
105	908.924	mut	54.3796	706.765	0.5179
419.128	913.949	mut	217.067	709.368	0.5179
557.6	920.371	mut	288.781	712.694	0.5179
495.328	924.483	mut	256.531	714.823	0.5179
263.729	927.525	mut	136.585	716.399	0.5179
204.073	935.768	mut	105.69	720.668	0.5179
131.819	948.41	mut	68.2691	727.215	0.5179
262.237	991.5	mut	135.813	749.531	0.5179
139.675	1039.81	mut	72.3378	774.552	0.5179
72.152	1051.86	mut	37.3676	780.794	0.5179
115	1054	mut	59.5586	781.9	0.5179
460.145	1054.95	mut	238.309	782.393	0.5179
208.5	1065	mut	107.982	787.597	0.5179
265.429	1070.19	mut	137.466	790.287	0.5179
420.194	1084.63	mut	217.619	797.763	0.5179
283.465	1125.37	mut	146.807	818.864	0.5179
107.962	1160.79	mut	55.9136	837.206	0.5179
178.881	1176.22	mut	92.6426	845.2	0.5179
314.879	729.224	mut	163.076	613.698	0.5179
36.417	755.117	mut	18.8604	627.108	0.5179
266.667	790.25	mut	138.107	645.304	0.5179
136.93	805.802	mut	70.9161	653.358	0.5179
177	815.2	mut	91.6684	658.225	0.5179
46.274	819.129	mut	23.9653	660.26	0.5179
299.694	827.952	mut	155.212	664.83	0.5179
10	849.714	mut	5.17901	676.1	0.5179
135.234	853.468	mut	70.0378	678.044	0.5179
66.578	868.663	mut	34.4808	685.914	0.5179
238.6	880.75	mut	123.571	692.174	0.5179
196.212	908.263	mut	101.618	706.423	0.5179
181.719	946.656	mut	94.1124	726.307	0.5179
308.5	964	mut	159.772	735.289	0.5179
250.159	973.609	mut	129.557	740.266	0.5179
218.425	1001.55	mut	113.122	754.735	0.5179
295	1017.39	mut	152.781	762.941	0.5179
180.7	1088.88	mut	93.5846	799.962	0.5179
328.422	1090.23	mut	170.09	800.666	0.5179
203.421	1114.78	mut	105.352	813.376	0.5179
251.455	1129.45	mut	130.229	820.978	0.5179
161	1152.81	mut	83.382	833.074	0.5179
197.8	570.4	mut	102.441	531.443	0.5179
267.643	597.393	mut	138.612	545.423	0.5179
437.062	633.938	mut	226.355	564.35	0.5179
299.971	704.971	mut	155.355	601.138	0.5179
233.156	715.022	mut	120.752	606.343	0.5179
369.3	727.86	mut	191.261	612.992	0.5179
273.612	752.327	mut	141.704	625.663	0.5179
508.632	752.526	mut	263.421	625.767	0.5179
299.569	783.471	mut	155.147	641.793	0.5179
327.773	833.386	mut	169.754	667.644	0.5179
251.844	853.062	mut	130.43	677.834	0.5179
433.815	869.723	mut	224.673	686.463	0.5179
284.411	874.911	mut	147.297	689.15	0.5179
337.467	924.433	mut	174.774	714.797	0.5179
236.22	947.16	mut	122.338	726.568	0.5179
289.574	993.82	mut	149.971	750.733	0.5179
397.815	1028	mut	206.029	768.435	0.5179
286.731	1034.48	mut	148.498	771.79	0.5179
[truncated: 5,597 more rows]
