# Supplementary figures and images for: Dermal appendage-dependent patterning of zebrafish atoh1a+ Merkel cells
Source: eLife journal article supplement (doi:10.7554/elife.85800), 2023-01-17

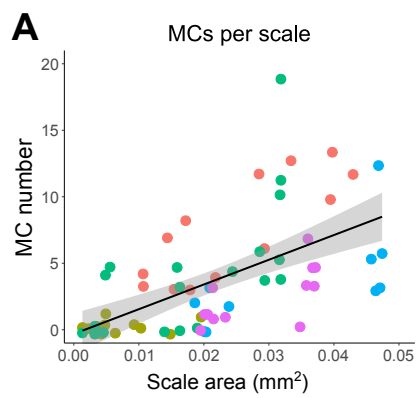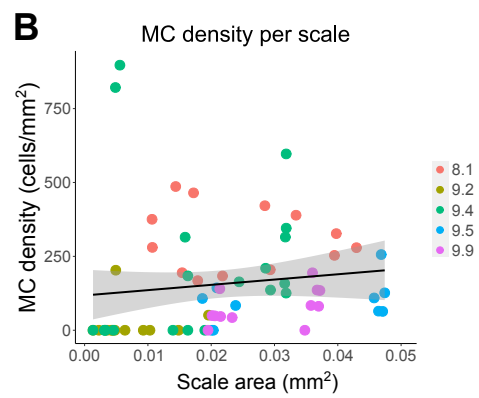

Supplement: supp [file elife-85800-supp-v1.zip]

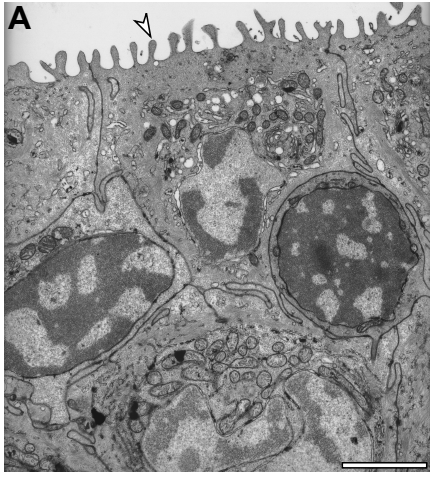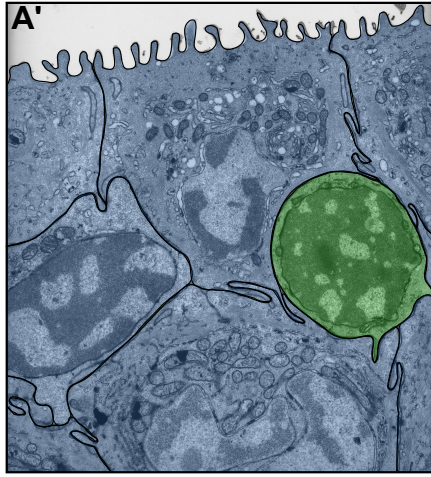

Supplement: supp [file elife-85800-supp-v1.zip]

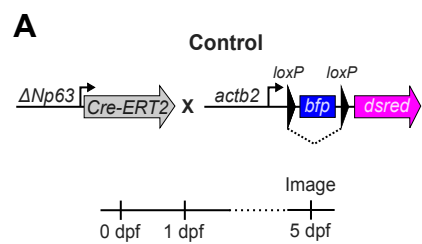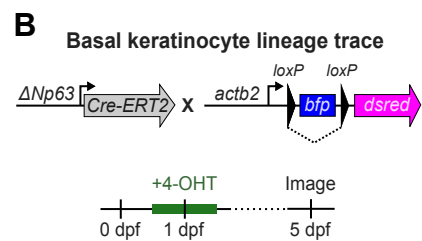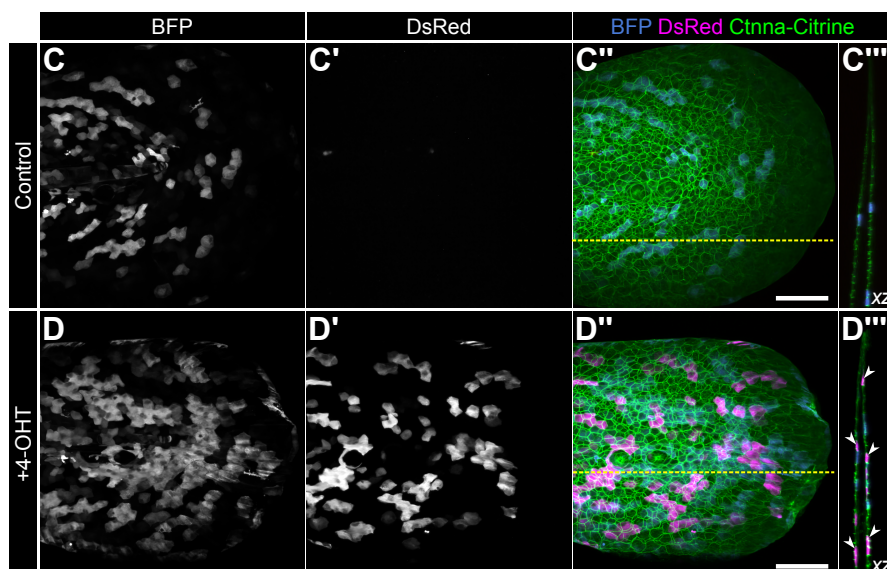

Supplement: supp [file elife-85800-supp-v1.zip]

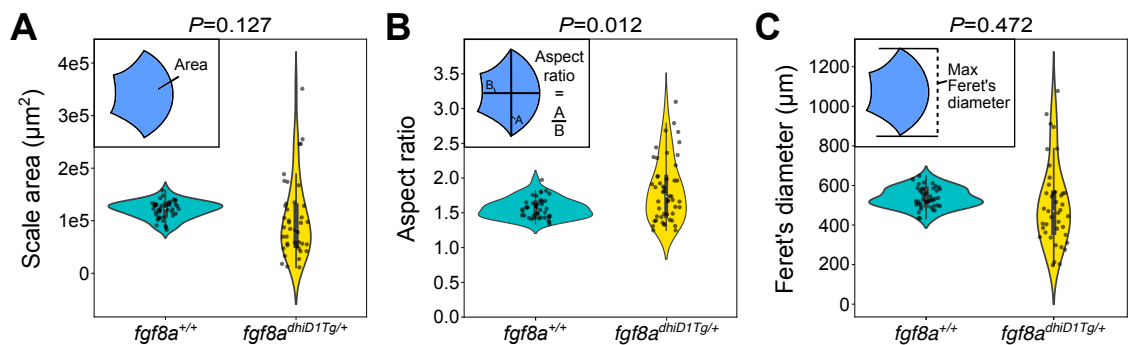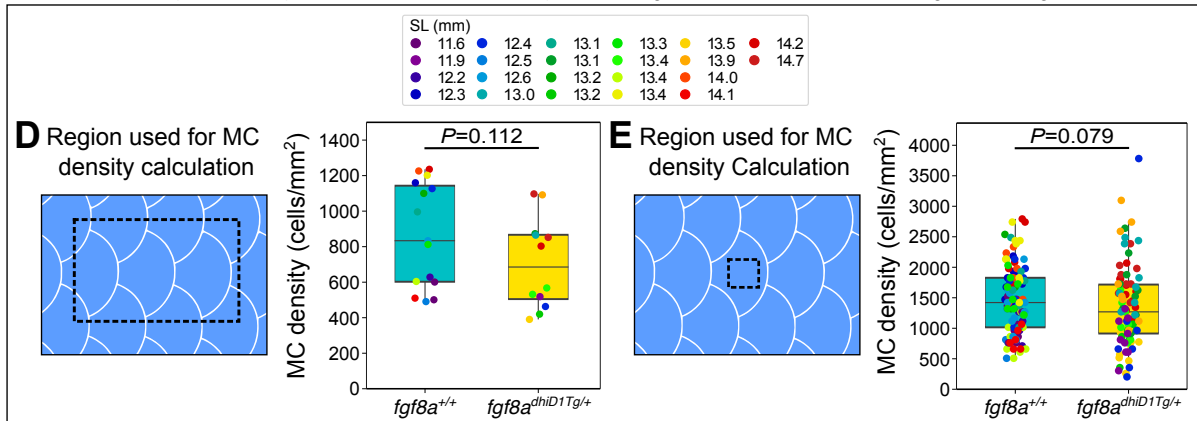

Supplement: supp [file elife-85800-supp-v1.zip]

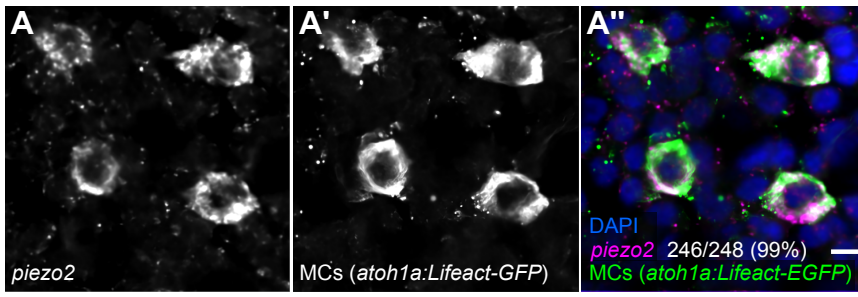

Supplement: supp [file elife-85800-supp-v1.zip]

*atoh1a:nls-Eos* (3 dpf)

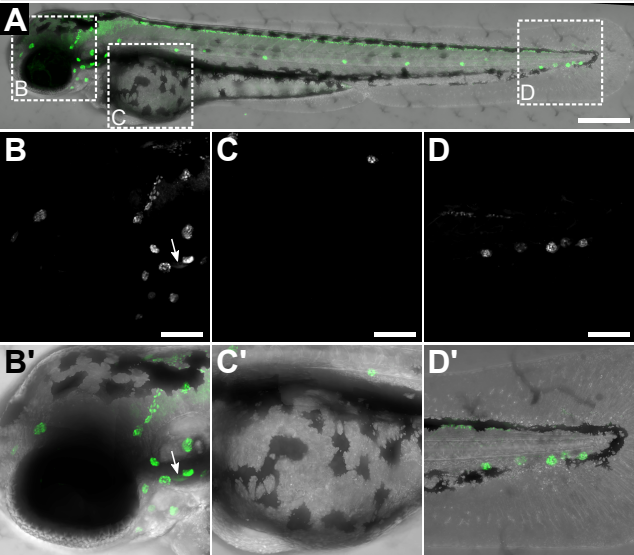

*atoh1a:Lifeact-EGFP* (3 dpf)

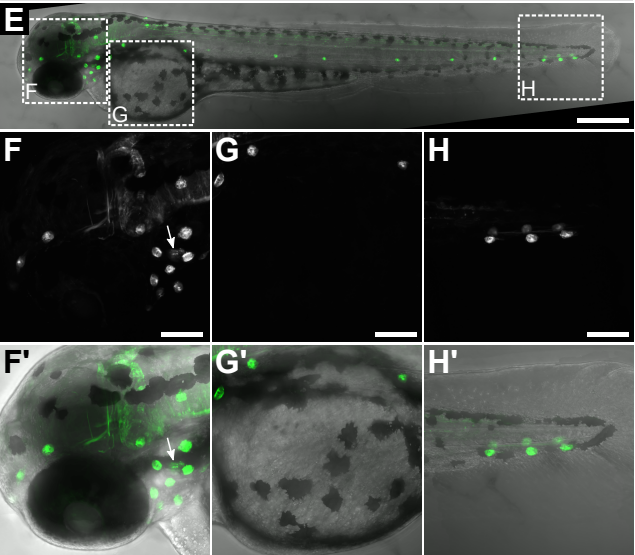

Supplement: supp [file elife-85800-supp-v1.zip]

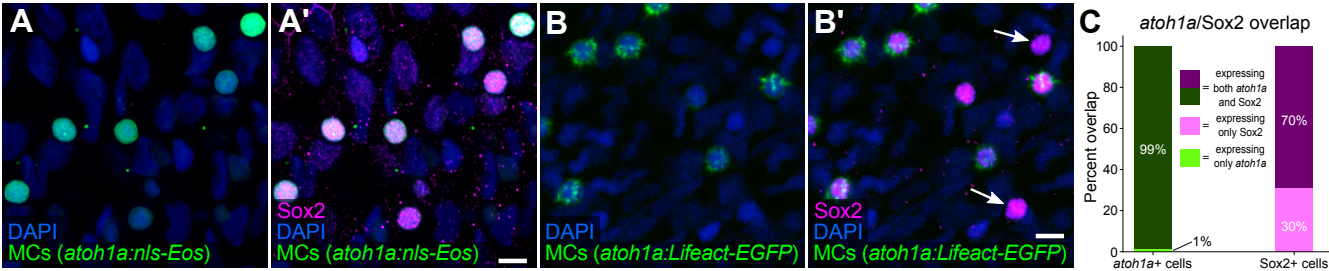

Supplement: supp [file elife-85800-supp-v1.zip]

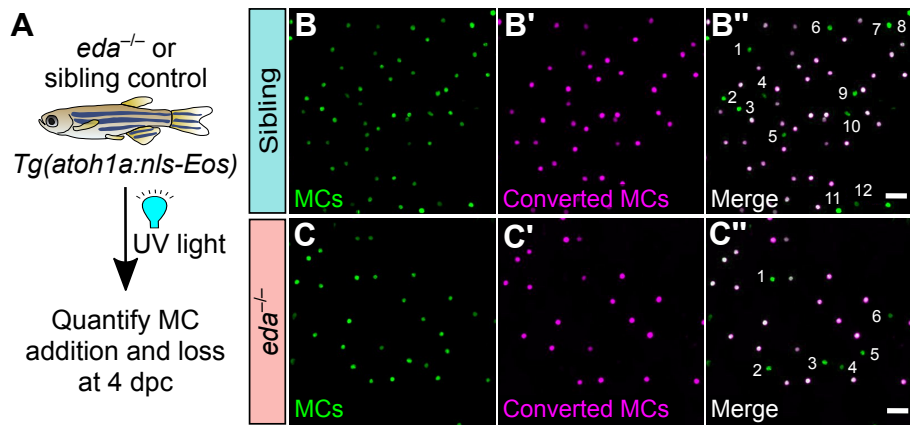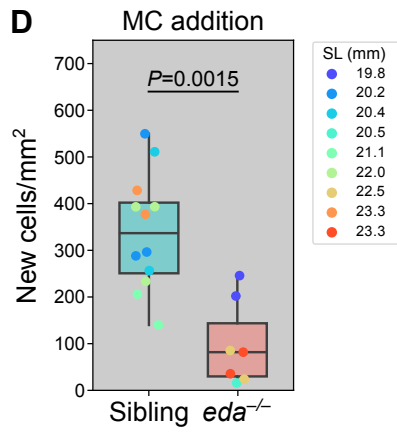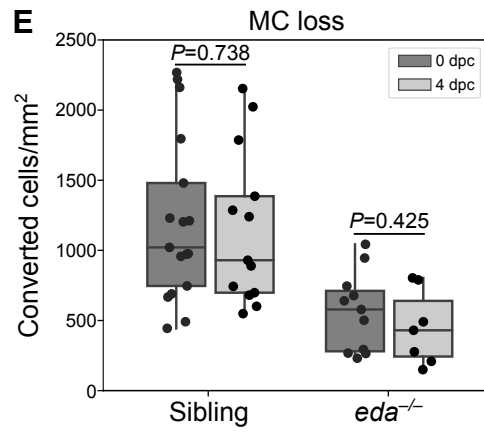

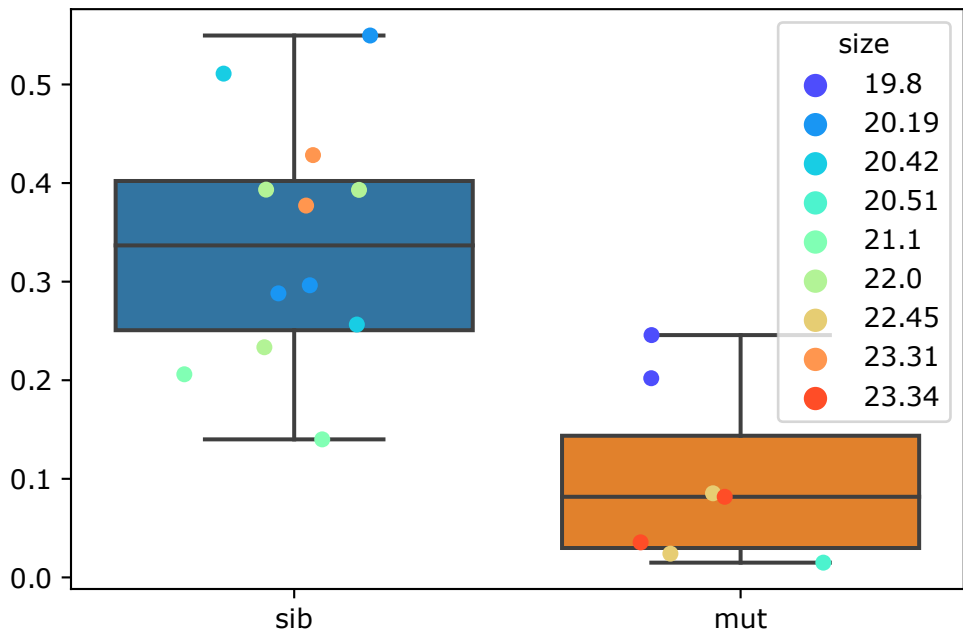

Supplement: supp [file elife-85800-supp-v1.zip]
